# Supplementary material for: Comparative analysis of tuberous root metabolites between cultivated and wild varieties of Rehmannia glutinosa by widely targeted metabolomics
Source: PubMed Central journal article supplement (PMC8169854; doi:10.1038/s41598-021-90961-6), 2021-06-01
Supplement: 41598_2021_90961_MOESM1_ESM.pdf [file 41598_2021_90961_MOESM1_ESM.pdf]

# Comparative Analysis of Tuberos Root Metabolites between Cultivated and Wild Varieties of *Rehmannia Glutinosa* by Widely Targeted Metabolomics

Yanqing Zhou<sup>1\*</sup>, Luying Shao<sup>1\*</sup>, Jialin Zhu<sup>1\*</sup>, Huimin Li<sup>1</sup>, Hongying Duan<sup>1</sup>

<sup>1</sup>College of Life Sciences, Henan Normal University, Xixiang, 453007, HN, P.R.China

\*corresponding. Author @ yqzhou@htu.cn

\*these authors contributed equally to this work

Table. S1. Information of 228 secondary metabolites

| No. | Q1 (Da) | Molecular Weight (Da) | Ionization model | Formula                                          | Compounds                            | Class          | mix01   | mix02   | mix03   | YS-1    | YS-2    | YS-3    | ZP-1    | ZP-2    | ZP-3    |
|-----|---------|-----------------------|------------------|--------------------------------------------------|--------------------------------------|----------------|---------|---------|---------|---------|---------|---------|---------|---------|---------|
| 1   | 623.1   | 624.14                | [M-H]-           | C <sub>28</sub> H <sub>32</sub> O <sub>16</sub>  | Isorhamnetin-3-O-rutinoside          | Flavonoids     | 1680000 | 1900000 | 1710000 | 407000  | 406000  | 421000  | 3130000 | 2970000 | 2220000 |
| 2   | 331.07  | 332.075               | [M-H]-           | C <sub>13</sub> H <sub>16</sub> O <sub>10</sub>  | 3-O-Galloyl-β-D-glucose              | Tannins        | 145000  | 183000  | 181000  | 136000  | 301000  | 302000  | 110000  | 99700   | 86900   |
| 3   | 331.07  | 332.075               | [M-H]-           | C <sub>13</sub> H <sub>16</sub> O <sub>10</sub>  | 2-O-Galloyl-β-D-glucose              | Tannins        | 546000  | 536000  | 594000  | 145000  | 211000  | 206000  | 720000  | 893000  | 1030000 |
| 4   | 169.05  | 168.042               | [M+H]+           | C <sub>8</sub> H <sub>8</sub> O <sub>4</sub>     | Gallacetophenone                     | Others         | 9320    | 10400   | 7490    | 12700   | 14000   | 11600   | 10700   | 5630    | 11900   |
| 5   | 507.17  | 508.179               | [M-H]-           | C <sub>21</sub> H <sub>32</sub> O <sub>14</sub>  | 6'-O-glucosylaucubin                 | Others         | 80300   | 123000  | 86800   | 12300   | 21900   | 17400   | 203000  | 206000  | 184000  |
| 6   | 487.15  | 488.152               | [M-H]-           | C <sub>21</sub> H <sub>28</sub> O <sub>13</sub>  | Cistanoside F                        | Phenolic acids | 1130000 | 1170000 | 1090000 | 609000  | 646000  | 594000  | 1980000 | 2580000 | 1970000 |
| 7   | 639.19  | 638.184               | [M+H]+           | C <sub>29</sub> H <sub>34</sub> O <sub>16</sub>  | Limocitrin-O-rhamnoside-O-rhamnoside | Flavonoids     | 282000  | 313000  | 321000  | 545000  | 632000  | 602000  | 5900    | 6050    | 5410    |
| 8   | 227.13  | 226.114               | [M+H]+           | C <sub>14</sub> H <sub>14</sub> N <sub>2</sub> O | Crenatine                            | Alkaloids      | 167000  | 154000  | 194000  | 220000  | 249000  | 253000  | 64700   | 83300   | 79100   |
| 9   | 461.17  | 462.174               | [M-H]-           | C <sub>20</sub> H <sub>30</sub> O <sub>12</sub>  | Verbasoside                          | Phenolic acids | 2080000 | 2220000 | 2170000 | 1700000 | 1970000 | 1900000 | 2190000 | 2680000 | 3240000 |
| 10  | 637.18  | 638.184               | [M-H]-           | C <sub>29</sub> H <sub>34</sub> O <sub>16</sub>  | β-Oxoacteoside                       | Others         | 163000  | 167000  | 142000  | 25000   | 25000   | 31900   | 371000  | 396000  | 233000  |

|    |        |         |        |               |                                                             |                   |         |         |         |         |         |         |              |              |              |
|----|--------|---------|--------|---------------|-------------------------------------------------------------|-------------------|---------|---------|---------|---------|---------|---------|--------------|--------------|--------------|
| 11 | 651.23 | 652.237 | [M-H]- | C31H40O<br>15 | Cistanoside D                                               | Others            | 6240000 | 6360000 | 7170000 | 3440000 | 3270000 | 3220000 | 1050000<br>0 | 1460000<br>0 | 8950000      |
| 12 | 625.21 | 624.205 | [M+H]+ | C29H36O<br>15 | Isoacteoside                                                | Others            | 1820000 | 1840000 | 1720000 | 230000  | 318000  | 416000  | 3320000      | 4350000      | 2020000      |
| 13 | 179.07 | 178.063 | [M+H]+ | C10H10O<br>3  | 4-Hydroxy-3-methoxy<br>cinnamaldehyde                       | Phenolic<br>acids | 339000  | 367000  | 374000  | 462000  | 474000  | 436000  | 205000       | 252000       | 275000       |
| 14 | 487.35 | 488.35  | [M-H]- | C30H48O<br>5  | Madasiatic acid                                             | Terpenoids        | 4320000 | 4330000 | 4650000 | 936000  | 733000  | 980000  | 8180000      | 8950000      | 1110000<br>0 |
| 15 | 471.35 | 472.355 | [M-H]- | C30H48O<br>4  | Corosolic acid                                              | Terpenoids        | 522000  | 496000  | 501000  | 129000  | 132000  | 145000  | 980000       | 1280000      | 1320000      |
| 16 | 387.2  | 386.194 | [M+H]+ | C19H30O<br>8  | Roseoside                                                   | Flavonoids        | 60000   | 48300   | 67100   | 63700   | 61100   | 72200   | 47300        | 80500        | 73100        |
| 17 | 531.33 | 532.338 | [M-H]- | C31H48O<br>7  | Phytolaccagenin                                             | Terpenoids        | 61300   | 66300   | 82800   | 9       | 9       | 9       | 155000       | 157000       | 152000       |
| 18 | 315.11 | 316.116 | [M-H]- | C14H20O<br>8  | 5-(2-Hydroxyethyl)-2-<br>O-glucosylohenol                   | Phenolic<br>acids | 392000  | 375000  | 353000  | 358000  | 419000  | 386000  | 392000       | 413000       | 387000       |
| 19 | 168.07 | 167.059 | [M+H]+ | C8H9NO3       | 4,5,6-Trihydroxy-2-cyc<br>lohexen-1-ylideneaceto<br>nitrile | Alkaloids         | 384000  | 415000  | 419000  | 453000  | 430000  | 455000  | 426000       | 414000       | 431000       |
| 20 | 314.12 | 313.117 | [M+H]+ | C14H19N<br>O7 | Ehretioside                                                 | Alkaloids         | 90100   | 72200   | 84800   | 113000  | 109000  | 109000  | 9            | 9            | 9            |
| 21 | 297.12 | 298.12  | [M-H]- | C18H18O<br>4  | Tababiphenyl C                                              | Others            | 47200   | 62900   | 49600   | 35900   | 43400   | 46800   | 57600        | 46100        | 54100        |
| 22 | 427.06 | 426.028 | [M+H]+ | C17H14O<br>13 | Ditartaroyl-hydroxylco<br>umarin                            | Phenolic<br>acids | 584000  | 626000  | 646000  | 705000  | 684000  | 699000  | 733000       | 658000       | 708000       |
| 23 | 519.11 | 520.1   | [M-H]- | C24H24O<br>13 | Isorhamnetin acetyl<br>hexoside                             | Flavonoids        | 25900   | 19800   | 22100   | 23500   | 26300   | 25300   | 11700        | 9590         | 12900        |
| 24 | 451.1  | 452.076 | [M-H]- | C20H20O<br>12 | Maleoyl-caffeoylquinic<br>acid                              | Phenolic<br>acids | 53400   | 63500   | 55200   | 91100   | 93000   | 91000   | 11900        | 16300        | 13400        |
| 25 | 485.36 | 486.337 | [M-H]- | C31H50O<br>4  | Ursolic acid-OCH3                                           | Terpenoids        | 4540    | 4670    | 4930    | 2300    | 1910    | 2370    | 9790         | 8650         | 7090         |
| 26 | 309.06 | 310.069 | [M-H]- | C14H14O<br>8  | Feruloylmalic acid                                          | Phenolic<br>acids | 253000  | 276000  | 252000  | 70000   | 67600   | 58100   | 466000       | 512000       | 514000       |

|    |        |         |        |               |                                                    |                             |              |              |              |              |              |              |         |         |         |
|----|--------|---------|--------|---------------|----------------------------------------------------|-----------------------------|--------------|--------------|--------------|--------------|--------------|--------------|---------|---------|---------|
| 27 | 299.06 | 300.063 | [M-H]- | C16H12O<br>6  | Aracarpene 1                                       | Flavonoids                  | 149000       | 159000       | 153000       | 220000       | 187000       | 181000       | 9       | 9       | 9       |
| 28 | 675.41 | 679.419 | [M-H]- | C38H60O<br>10 | 3-O-(2-O-Acetyl-β-D-glucopyranosyl) oleanolic acid | Terpenoids                  | 1190000<br>0 | 1280000<br>0 | 1000000<br>0 | 1290000<br>0 | 1610000<br>0 | 1310000<br>0 | 4440000 | 6050000 | 5020000 |
| 29 | 463.12 | 462.116 | [M+H]+ | C22H22O<br>11 | Methylquercetin rha                                | Flavonoids                  | 12100        | 11200        | 16400        | 12700        | 14000        | 15100        | 26900   | 8340    | 7840    |
| 30 | 579.21 | 580.216 | [M-H]- | C28H36O<br>13 | Syringaresinol-4'-O-β-D-monO-glucoside             | Lignans<br>and<br>Coumarins | 177000       | 213000       | 140000       | 189000       | 250000       | 156000       | 89600   | 114000  | 92300   |
| 31 | 623.13 | 624.133 | [M-H]- | C27H28O<br>17 | Kaempferol<br>3-glucuronide-7-glucoside            | Flavonoids                  | 35800        | 37700        | 49400        | 86900        | 63600        | 79800        | 9       | 9       | 9       |
| 32 | 621.11 | 622.117 | [M-H]- | C27H26O<br>17 | Apigenin-7-O-diglucuronide                         | Flavonoids                  | 427000       | 392000       | 415000       | 817000       | 649000       | 685000       | 9       | 9       | 9       |
| 33 | 331.08 | 330.074 | [M+H]+ | C17H14O<br>7  | Tricin                                             | Flavonoids                  | 11200        | 11000        | 15100        | 15500        | 14600        | 14300        | 9       | 9       | 9       |
| 34 | 595.16 | 594.158 | [M+H]+ | C27H30O<br>15 | Kaempferol glc-rha                                 | Flavonoids                  | 73600        | 95800        | 100000       | 158000       | 170000       | 126000       | 9       | 9       | 9       |
| 35 | 591.21 | 592.186 | [M-H]- | C29H36O<br>13 | (+)-Medioresinol-aceGlu                            | Lignans<br>and<br>Coumarins | 198000       | 195000       | 213000       | 315000       | 305000       | 299000       | 70400   | 63700   | 57400   |
| 36 | 519.19 | 520.168 | [M-H]- | C26H32O<br>11 | Pinoresinol-Hexose                                 | Lignans<br>and<br>Coumarins | 334000       | 381000       | 401000       | 198000       | 212000       | 203000       | 592000  | 609000  | 520000  |
| 37 | 561.2  | 562.177 | [M-H]- | C28H34O<br>12 | Pinoresinol-acetylglucose                          | Lignans<br>and<br>Coumarins | 277000       | 258000       | 279000       | 384000       | 325000       | 333000       | 121000  | 133000  | 118000  |
| 38 | 579.21 | 580.186 | [M-H]- | C28H36O<br>13 | Syringaresinol-Hex                                 | Lignans<br>and<br>Coumarins | 350000       | 370000       | 382000       | 370000       | 346000       | 350000       | 405000  | 389000  | 410000  |
| 39 | 621.21 | 622.195 | [M-H]- | C30H38O<br>14 | Syringaresinol-aceGlu                              | Lignans<br>and              | 252000       | 232000       | 230000       | 283000       | 280000       | 238000       | 176000  | 157000  | 203000  |

|    |        |         |        |                |                                         | Coumarins         |         |         |         |         |         |         |         |         |         |
|----|--------|---------|--------|----------------|-----------------------------------------|-------------------|---------|---------|---------|---------|---------|---------|---------|---------|---------|
| 40 | 345.17 | 346.163 | [M-H]- | C16H26O<br>8   | Rehmapicroside                          | Others            | 1670000 | 1730000 | 1830000 | 2270000 | 2090000 | 2040000 | 1030000 | 1100000 | 1010000 |
| 41 | 496.34 | 497.19  | [M-H]- | C23H31N<br>O11 | Rehmaglutoside D                        | Terpenoids        | 1370000 | 1400000 | 1360000 | 1100000 | 1090000 | 1080000 | 1670000 | 2230000 | 1650000 |
| 42 | 325.18 | 324.15  | [M+H]+ | C16H24O<br>5N2 | Anabasine-Hexose                        | Alkaloids         | 66700   | 70500   | 69700   | 52500   | 59800   | 64200   | 65700   | 58300   | 67000   |
| 43 | 282.28 | 281.249 | [M+H]+ | C18H35N<br>O   | Octadecenoic amide                      | Others            | 96700   | 93800   | 91900   | 275000  | 323000  | 195000  | 86700   | 104000  | 217000  |
| 44 | 325.09 | 326.1   | [M-H]- | C15H18O<br>8   | p-Coumaric<br>acid-O-glycoside          | Phenolic<br>acids | 829000  | 880000  | 874000  | 1110000 | 1320000 | 1090000 | 354000  | 324000  | 337000  |
| 45 | 355.1  | 356.11  | [M-H]- | C16H20O<br>9   | Feruloyl glucose                        | Phenolic<br>acids | 236000  | 249000  | 222000  | 222000  | 227000  | 250000  | 323000  | 320000  | 351000  |
| 46 | 385.11 | 386.121 | [M-H]- | C17H22O<br>10  | Isosinapic<br>acid-hexoside             | Phenolic<br>acids | 288000  | 290000  | 313000  | 430000  | 438000  | 413000  | 67800   | 88900   | 78400   |
| 47 | 301.07 | 300.063 | [M+H]+ | C16H12O<br>6   | 6,7,8-Tetrahydroxy-5-<br>methoxyflavone | Flavonoids        | 56900   | 60000   | 58000   | 81700   | 67300   | 68800   | 9       | 9       | 9       |
| 48 | 179.06 | 178.055 | [M+H]+ | C10H10O<br>3   | Coniferaldehyde                         | Phenolic<br>acids | 32600   | 37000   | 24000   | 45300   | 41300   | 50100   | 20400   | 27600   | 19100   |
| 49 | 193.06 | 194.049 | [M-H]- | C10H10O<br>4   | Ferulic acid                            | Phenolic<br>acids | 1040000 | 976000  | 1220000 | 1340000 | 1410000 | 1310000 | 505000  | 534000  | 625000  |
| 50 | 203    | 202.197 | [M+H]+ | C10H26N<br>4   | Spermine                                | Alkaloids         | 1260000 | 1630000 | 1410000 | 1690000 | 1650000 | 1760000 | 1620000 | 1640000 | 1370000 |
| 51 | 197.05 | 198.044 | [M-H]- | C9H10O5        | Syringic acid                           | Phenolic<br>acids | 272000  | 260000  | 311000  | 373000  | 386000  | 375000  | 93700   | 109000  | 117000  |
| 52 | 167    | 168.035 | [M-H]- | C8H8O4         | Vanillic acid                           | Phenolic<br>acids | 1720000 | 1380000 | 1570000 | 2130000 | 1800000 | 2200000 | 312000  | 373000  | 489000  |
| 53 | 447.09 | 446.068 | [M+H]+ | C21H18O<br>11  | Baicalin                                | Flavonoids        | 935000  | 1050000 | 1040000 | 1980000 | 1650000 | 1620000 | 28100   | 55900   | 67500   |
| 54 | 299.06 | 300.053 | [M-H]- | C16H12O<br>6   | Diosmetin                               | Flavonoids        | 150000  | 155000  | 145000  | 209000  | 184000  | 186000  | 9       | 9       | 9       |
| 55 | 179.08 | 180.07  | [M-H]- | C10H12O        | Coniferyl alcohol                       | Phenolic          | 2910000 | 2610000 | 2570000 | 3690000 | 3530000 | 3280000 | 975000  | 1190000 | 1050000 |

|    |        |         |         |             |                              |                       |          |          |          |          |         |         |         |         |         |
|----|--------|---------|---------|-------------|------------------------------|-----------------------|----------|----------|----------|----------|---------|---------|---------|---------|---------|
|    |        |         |         | 3           |                              | acids                 |          |          |          |          |         |         |         |         |         |
| 56 | 355.13 | 356.11  | [M-H]-  | C20H20O6    | (+)-Piperitol                | Lignans and Coumarins | 27100    | 26400    | 27700    | 35400    | 36000   | 46100   | 3710    | 4110    | 5280    |
| 57 | 357.14 | 358.125 | [M-H]-  | C20H22O6    | Pinoresinol                  | Lignans and Coumarins | 473000   | 437000   | 453000   | 633000   | 635000  | 622000  | 96100   | 93100   | 94300   |
| 58 | 160.05 | 161.042 | [M-H]-  | C9H7NO2     | Indole-5-carboxylic acid     | Alkaloids             | 35800    | 33500    | 34200    | 42000    | 39600   | 42800   | 22800   | 26400   | 17500   |
| 59 | 146.1  | 145.047 | [M+H]+  | C9H7NO      | Indole-3-carboxaldehyde      | Alkaloids             | 69000    | 81900    | 77800    | 83000    | 89400   | 70000   | 41000   | 52200   | 76500   |
| 60 | 595.17 | 630.107 | [M-Cl]+ | C27H31ClO15 | Pelargonin chloride          | Flavonoids            | 14300    | 16500    | 13400    | 9        | 9       | 9       | 42200   | 53400   | 41800   |
| 61 | 153    | 154.021 | [M-H]-  | C7H6O4      | 2,5-Dihydroxybenzoic acid    | Phenolic acids        | 150000   | 139000   | 126000   | 128000   | 122000  | 135000  | 121000  | 216000  | 218000  |
| 62 | 117.03 | 118.021 | [M-H]-  | C4H6O4      | Succinic acid                | Others                | 4760000  | 4510000  | 5310000  | 5290000  | 5960000 | 5790000 | 3070000 | 4100000 | 3340000 |
| 63 | 133    | 134.015 | [M-H]-  | C4H6O5      | L(-)-Malic acid              | Others                | 1300000  | 1590000  | 1820000  | 1210000  | 1170000 | 1340000 | 1420000 | 1740000 | 2010000 |
| 64 | 191    | 192.018 | [M-H]-  | C6H8O7      | Citric Acid                  | Others                | 12300000 | 11200000 | 11800000 | 11400000 | 8520000 | 8330000 | 8340000 | 9140000 | 9150000 |
| 65 | 165.05 | 166.038 | [M-H]-  | C5H10O6     | D-Xylonic acid               | Others                | 5360000  | 5130000  | 5270000  | 7750000  | 6960000 | 6930000 | 4510000 | 4260000 | 4300000 |
| 66 | 151.05 | 152.041 | [M-H]-  | C8H8O3      | Vanillin                     | Phenolic acids        | 6530000  | 5820000  | 6160000  | 9280000  | 8260000 | 9050000 | 1180000 | 1340000 | 1450000 |
| 67 | 122.1  | 121.082 | [M+H]+  | C8H11N      | Phenethylamine               | Others                | 75700    | 73200    | 82400    | 72100    | 75900   | 65400   | 71400   | 148000  | 77400   |
| 68 | 121.04 | 122.032 | [M-H]-  | C7H6O2      | 4-Hydroxybenzaldehyde        | Phenolic acids        | 165000   | 155000   | 140000   | 222000   | 216000  | 215000  | 73400   | 98800   | 77900   |
| 69 | 219    | 218.095 | [M+H]+  | C12H14N2O2  | N-Acetyl-5-hydroxytryptamine | Alkaloids             | 95400    | 104000   | 87400    | 71100    | 68600   | 61200   | 154000  | 216000  | 145000  |
| 70 | 140    | 141.011 | [M-H]-  | C2H8NO4P    | O-Phosphorylethanolamine     | Others                | 23700    | 26100    | 26000    | 9410     | 8460    | 6700    | 48900   | 41200   | 38600   |
| 71 | 319.05 | 320.041 | [M-H]-  | C15H12O8    | Dihydropyricetin(Ampelopsin) | Flavonoids            | 44700    | 38200    | 31700    | 21600    | 29000   | 30800   | 43700   | 31900   | 38800   |
| 72 | 137.03 | 138.026 | [M-H]-  | C7H6O3      | 4-Hydroxybenzoic acid        | Phenolic              | 396000   | 387000   | 384000   | 430000   | 427000  | 456000  | 248000  | 301000  | 435000  |

|    |        |         |        |               |                                                   |                             |         |         |         |         |         |         |         |         |         |  |
|----|--------|---------|--------|---------------|---------------------------------------------------|-----------------------------|---------|---------|---------|---------|---------|---------|---------|---------|---------|--|
|    |        |         |        |               |                                                   | acids                       |         |         |         |         |         |         |         |         |         |  |
| 73 | 341    | 342.113 | [M-H]- | C16H22O<br>8  | Coniferin                                         | Phenolic<br>acids           | 3440000 | 3120000 | 3520000 | 1270000 | 1290000 | 1120000 | 5370000 | 7410000 | 5640000 |  |
| 74 | 149    | 150.061 | [M-H]- | C9H10O2       | p-Coumaryl alcohol                                | Phenolic<br>acids           | 302000  | 334000  | 302000  | 495000  | 466000  | 486000  | 25600   | 36800   | 28400   |  |
| 75 | 326.31 | 325.272 | [M+H]+ | C20H39N<br>O2 | N-Oleoylethanolamine                              | Others                      | 6030    | 5950    | 5820    | 12800   | 13100   | 12400   | 747     | 865     | 697     |  |
| 76 | 209.2  | 208.029 | [M+H]+ | C10H8O5       | Fraxetin                                          | Lignans<br>and<br>Coumarins | 1460000 | 1170000 | 1310000 | 1430000 | 1400000 | 1140000 | 1710000 | 1330000 | 1680000 |  |
| 77 | 339.1  | 340.065 | [M-H]- | C15H16O<br>9  | Esculin(6,7-Dihydroxy<br>Coumarin-6-glucoside)    | Lignans<br>and<br>Coumarins | 39100   | 41200   | 42700   | 69100   | 65000   | 67300   | 5970    | 11300   | 13600   |  |
| 78 | 741.22 | 740.181 | [M+H]+ | C33H40O<br>19 | Robinin(Kaempferol-3<br>-O-gal-rham-7-O-rham<br>) | Flavonoids                  | 24900   | 38200   | 33200   | 9       | 9       | 9       | 161000  | 72100   | 22600   |  |
| 79 | 595.2  | 594.132 | [M+H]+ | C27H30O<br>15 | Apigenin<br>6,8-C-diglucoside                     | Flavonoids                  | 105000  | 129000  | 116000  | 119000  | 100000  | 103000  | 118000  | 100000  | 101000  |  |
| 80 | 799.2  | 800.233 | [M-H]- | C36H48O<br>20 | Cistanoside A                                     | Phenolic<br>acids           | 638000  | 606000  | 633000  | 454000  | 478000  | 555000  | 560000  | 671000  | 752000  |  |
| 81 | 665.2  | 666.184 | [M-H]- | C31H38O<br>16 | 2'-Acetylaceoside                                 | Phenolic<br>acids           | 1560000 | 1860000 | 1810000 | 106000  | 47100   | 101000  | 4500000 | 2440000 | 4070000 |  |
| 82 | 179.1  | 178.055 | [M+H]+ | C10H10O<br>3  | Methyl p-coumarate                                | Phenolic<br>acids           | 856000  | 841000  | 842000  | 1180000 | 1110000 | 1140000 | 426000  | 464000  | 561000  |  |
| 83 | 177    | 178.055 | [M-H]- | C10H10O<br>3  | Trans-4-Hydroxycinna<br>mic Acid Methyl Ester     | Phenolic<br>acids           | 1260000 | 1320000 | 1300000 | 1950000 | 1950000 | 1910000 | 536000  | 576000  | 735000  |  |
| 84 | 209.1  | 208.064 | [M+H]+ | C11H12O<br>4  | Methyl ferulate                                   | Phenolic<br>acids           | 2620000 | 2610000 | 2570000 | 1220000 | 1290000 | 1210000 | 5380000 | 4410000 | 6370000 |  |
| 85 | 162.07 | 161.059 | [M+H]+ | C6H11NO<br>4  | DL-2-Aminoadipic<br>acid                          | Alkaloids                   | 69700   | 63800   | 72800   | 94000   | 85800   | 87500   | 62900   | 58100   | 75800   |  |
| 86 | 181.06 | 182.049 | [M-H]- | C9H10O4       | Syringic Aldehyde                                 | Phenolic<br>acids           | 379000  | 319000  | 365000  | 549000  | 499000  | 529000  | 140000  | 128000  | 126000  |  |
| 87 | 193.06 | 194.049 | [M-H]- | C10H10O       | Trans-ferulic acid                                | Phenolic                    | 1150000 | 1150000 | 1170000 | 1580000 | 1510000 | 1890000 | 666000  | 603000  | 730000  |  |

|     |        |         |        |           |                                  |                |              |              |              |         |         |         |              |              |              |
|-----|--------|---------|--------|-----------|----------------------------------|----------------|--------------|--------------|--------------|---------|---------|---------|--------------|--------------|--------------|
|     |        |         |        | 4         |                                  | acids          |              |              |              |         |         |         |              |              |              |
| 88  | 160    | 161.042 | [M-H]- | C9H7NO2   | Indole-3-carboxylic acid         | Alkaloids      | 67500        | 56800        | 69600        | 80800   | 69300   | 77400   | 40300        | 48200        | 39300        |
| 89  | 314.1  | 313.117 | [M+H]+ | C18H19NO4 | N-Feruloyltyramine               | Alkaloids      | 11300        | 11300        | 10500        | 16400   | 20400   | 17600   | 4470         | 5570         | 6980         |
| 90  | 639.2  | 640.169 | [M-H]- | C29H36O16 | Plantamajoside                   | Phenolic acids | 741000       | 955000       | 902000       | 902000  | 876000  | 827000  | 769000       | 881000       | 1300000      |
| 91  | 373.11 | 374.102 | [M-H]- | C16H22O10 | Geniposidic acid                 | Terpenoids     | 1200000<br>0 | 1220000<br>0 | 1030000<br>0 | 167000  | 263000  | 202000  | 2070000<br>0 | 2270000<br>0 | 2080000<br>0 |
| 92  | 549.18 | 550.16  | [M-H]- | C23H34O15 | Genipin 1-gentiobioside          | Terpenoids     | 40600        | 42400        | 49300        | 49400   | 75000   | 76800   | 38700        | 35400        | 40300        |
| 93  | 345.2  | 346.108 | [M-H]- | C15H22O9  | Aucubin                          | Terpenoids     | 3950000      | 3940000      | 3670000      | 54300   | 812000  | 865000  | 5170000      | 6120000      | 5990000      |
| 94  | 255.07 | 254.049 | [M+H]+ | C15H10O4  | Chrysophanic acid                | Quinones       | 192000       | 210000       | 212000       | 203000  | 210000  | 211000  | 131000       | 141000       | 141000       |
| 95  | 609.18 | 608.146 | [M+H]+ | C28H32O15 | Diosmin                          | Flavonoids     | 1440000      | 1690000      | 1590000      | 3060000 | 2900000 | 3190000 | 33500        | 132000       | 28900        |
| 96  | 193.07 | 194.067 | [M-H]- | C7H14O6   | D-Pinitol                        | Others         | 13400        | 11900        | 10700        | 16700   | 19200   | 17400   | 6430         | 7690         | 7650         |
| 97  | 179.04 | 180.035 | [M-H]- | C9H8O4    | Caffeic acid                     | Phenolic acids | 192000       | 134000       | 146000       | 202000  | 245000  | 215000  | 148000       | 210000       | 163000       |
| 98  | 299.12 | 300.105 | [M-H]- | C14H20O7  | Salidroside                      | Phenolic acids | 41000        | 32000        | 35200        | 31200   | 30200   | 26300   | 37800        | 50500        | 29400        |
| 99  | 137.07 | 138.061 | [M-H]- | C8H10O2   | Tyrosol                          | Phenolic acids | 23400        | 27600        | 26600        | 29300   | 28300   | 32800   | 20000        | 28400        | 24800        |
| 100 | 303.05 | 303.04  | [M]+   | C15H11O7  | Delphinidin chloride             | Flavonoids     | 13500        | 19200        | 18900        | 21600   | 25800   | 13400   | 24300        | 25500        | 22700        |
| 101 | 469    | 470.34  | [M-H]- | C30H46O4  | Hypoglycyrrhizic acid( $\beta$ ) | Terpenoids     | 20600        | 20100        | 19800        | 9130    | 9230    | 11400   | 41500        | 55300        | 35100        |
| 102 | 353.2  | 352.116 | [M+H]+ | C21H20O5  | 1-Methoxyphaseollin              | Others         | 57800        | 44900        | 49900        | 41900   | 39300   | 33500   | 30100        | 33000        | 39500        |
| 103 | 479.15 | 478.125 | [M+H]+ | C23H26O11 | Calceorioside B                  | Phenolic acids | 306000       | 209000       | 346000       | 88600   | 74300   | 79600   | 827000       | 866000       | 654000       |

|     |        |         |                    |                                                      |                                                              |                             |              |              |              |              |              |              |              |              |              |
|-----|--------|---------|--------------------|------------------------------------------------------|--------------------------------------------------------------|-----------------------------|--------------|--------------|--------------|--------------|--------------|--------------|--------------|--------------|--------------|
| 104 | 222.09 | 221.077 | [M+H] <sup>+</sup> | C <sub>8</sub> H <sub>15</sub> NO<br>6               | N-Acetyl-β-D-mannos<br>amine                                 | Others                      | 18200        | 20300        | 18000        | 23600        | 16200        | 18700        | 21900        | 22300        | 23500        |
| 105 | 167.07 | 168.07  | [M-H] <sup>-</sup> | C <sub>9</sub> H <sub>12</sub> O <sub>3</sub>        | Homovanillic alcohol                                         | Phenolic<br>acids           | 16400        | 15900        | 10600        | 11400        | 18100        | 16900        | 9            | 9            | 9            |
| 106 | 463.12 | 463.124 | [M] <sup>+</sup>   | C <sub>22</sub> H <sub>23</sub> O<br>11 <sup>+</sup> | Peonidin O-hexoside                                          | Flavonoids                  | 16000        | 29900        | 23500        | 52200        | 40400        | 45300        | 9            | 9            | 9            |
| 107 | 136.1  | 135.049 | [M+H] <sup>+</sup> | C <sub>5</sub> H <sub>5</sub> N <sub>5</sub>         | Aminopurine                                                  | Alkaloids                   | 245000       | 303000       | 281000       | 488000       | 548000       | 487000       | 34700        | 55500        | 36000        |
| 108 | 625.2  | 624.14  | [M+H] <sup>+</sup> | C <sub>28</sub> H <sub>32</sub> O<br>16              | Luteolin<br>O-feruloylhexoside                               | Flavonoids                  | 153000       | 149000       | 148000       | 129000       | 135000       | 147000       | 147000       | 178000       | 187000       |
| 109 | 339.1  | 338.067 | [M+H] <sup>+</sup> | C <sub>19</sub> H <sub>14</sub> O<br>6               | O-Feruloyl<br>4-hydroxycoumarin                              | Lignans<br>and<br>Coumarins | 3440000<br>0 | 3390000<br>0 | 3260000<br>0 | 3920000<br>0 | 3580000<br>0 | 3810000<br>0 | 3000000<br>0 | 3220000<br>0 | 2690000<br>0 |
| 110 | 104.1  | 103.091 | [M+H] <sup>+</sup> | C <sub>5</sub> H <sub>13</sub> NO                    | Choline                                                      | Alkaloids                   | 118000       | 137000       | 120000       | 178000       | 204000       | 181000       | 98800        | 110000       | 113000       |
| 111 | 235.1  | 234.123 | [M+H] <sup>+</sup> | C <sub>13</sub> H <sub>18</sub> N<br>2O <sub>2</sub> | N-p-Coumaroyl<br>putrescine                                  | Alkaloids                   | 39900        | 40100        | 28800        | 40400        | 54100        | 51600        | 35100        | 29800        | 21400        |
| 112 | 584.2  | 583.268 | [M+H] <sup>+</sup> | C <sub>34</sub> H <sub>37</sub> N<br>3O <sub>6</sub> | N',N'',N'''-p-Coumaroyl<br>-cinnamoyl-caffeoyl<br>spermidine | Alkaloids                   | 20200        | 20100        | 21900        | 23200        | 28100        | 33600        | 16700        | 19100        | 11500        |
| 113 | 337.2  | 336.16  | [M+H] <sup>+</sup> | C <sub>16</sub> H <sub>24</sub> N<br>4O <sub>4</sub> | N-Sinapoyl agmatine                                          | Alkaloids                   | 15700        | 21100        | 20800        | 21100        | 24100        | 24500        | 5540         | 6590         | 9750         |
| 114 | 411.1  | 410.164 | [M+H] <sup>+</sup> | C <sub>23</sub> H <sub>26</sub> N<br>2O <sub>5</sub> | N',N''-p-Coumaroyl-fer<br>uloyl putrescine                   | Alkaloids                   | 11700        | 9900         | 12700        | 6440         | 5330         | 5180         | 28300        | 26100        | 23400        |
| 115 | 477.14 | 477.14  | [M] <sup>+</sup>   | C <sub>23</sub> H <sub>25</sub> O<br>11 <sup>+</sup> | Rosinidin O-hexoside                                         | Flavonoids                  | 51800        | 44900        | 44100        | 62200        | 65100        | 60400        | 19700        | 18900        | 27400        |
| 116 | 509.1  | 508.1   | [M+H] <sup>+</sup> | C <sub>23</sub> H <sub>24</sub> O<br>13              | Syringetin<br>3-O-hexoside                                   | Flavonoids                  | 422000       | 504000       | 446000       | 46500        | 46700        | 43000        | 1220000      | 1180000      | 1370000      |
| 117 | 625.1  | 624.14  | [M+H] <sup>+</sup> | C <sub>28</sub> H <sub>32</sub> O<br>16              | Chrysoeriol<br>O-hexosyl-O-hexoside                          | Flavonoids                  | 43200        | 34500        | 45900        | 56200        | 61400        | 69700        | 9            | 9            | 9            |
| 118 | 549.1  | 548.094 | [M+H] <sup>+</sup> | C <sub>25</sub> H <sub>24</sub> O<br>14              | Chrysoeriol<br>O-malonylhexoside                             | Flavonoids                  | 118000       | 121000       | 144000       | 199000       | 210000       | 192000       | 21800        | 16700        | 20600        |
| 119 | 655.2  | 654.132 | [M+H] <sup>+</sup> | C <sub>32</sub> H <sub>30</sub> O<br>15              | C-Hexosyl-luteolin<br>O-sinapic acid                         | Flavonoids                  | 8940         | 8600         | 9040         | 15100        | 14300        | 21500        | 4500         | 2300         | 2410         |

|     |        |         |                     |                        |                                        |                       |         |         |         |         |         |         |         |         |         |
|-----|--------|---------|---------------------|------------------------|----------------------------------------|-----------------------|---------|---------|---------|---------|---------|---------|---------|---------|---------|
| 120 | 579.1  | 578.103 | [M+H] <sup>+</sup>  | C26H26O15              | Tricin O-malonylhexoside               | Flavonoids            | 69200   | 58800   | 74100   | 111000  | 116000  | 108000  | 9       | 9       | 9       |
| 121 | 493.1  | 492.105 | [M+H] <sup>+</sup>  | C23H24O12              | Tricin 7-O-hexoside                    | Flavonoids            | 210000  | 226000  | 250000  | 421000  | 468000  | 459000  | 16400   | 6950    | 16300   |
| 122 | 118    | 117.053 | [M+H] <sup>+</sup>  | C8H7N                  | Indole                                 | Alkaloids             | 61800   | 57900   | 62400   | 49800   | 59800   | 46900   | 74900   | 83600   | 81200   |
| 123 | 474.2  | 473.144 | [M+H] <sup>+</sup>  | C20H23N7O7             | 10-Formyl-THF                          | Alkaloids             | 1880000 | 2030000 | 1970000 | 1310000 | 1230000 | 1410000 | 3060000 | 3210000 | 3160000 |
| 124 | 343.1  | 342.262 | [M+H] <sup>+</sup>  | C19H38N2O3             | Cocamidopropyl βine                    | Alkaloids             | 49400   | 56900   | 60700   | 42000   | 48900   | 35700   | 58600   | 78900   | 78600   |
| 125 | 207.1  | 208.064 | [M-H] <sup>-</sup>  | C11H12O4               | 3,4-Dimethoxycinnamic acid             | Phenolic acids        | 1120000 | 1120000 | 1130000 | 554000  | 580000  | 555000  | 1970000 | 1800000 | 2590000 |
| 126 | 485.1  | 486.114 | [M-H] <sup>-</sup>  | C21H26O13              | 4-hydroxycoumarin di-glucoside         | Lignans and Coumarins | 16400   | 8190    | 10400   | 14900   | 16200   | 11100   | 14000   | 11800   | 15500   |
| 127 | 315.1  | 316.065 | [M-H] <sup>-</sup>  | C13H16O9               | 2,5-Dihydroxy benzoic acid O-hexside   | Phenolic acids        | 4160000 | 3890000 | 4250000 | 4990000 | 4760000 | 4310000 | 2480000 | 3330000 | 4090000 |
| 128 | 385.1  | 386.102 | [M-H] <sup>-</sup>  | C17H22O10              | 1-O-β-D-Glucopyranosyl sinapate        | Phenolic acids        | 35700   | 51800   | 33300   | 9       | 9       | 9       | 128000  | 107000  | 156000  |
| 129 | 465.1  | 466.073 | [M-H] <sup>-</sup>  | C24H18O10              | Cyanidin O-syringic acid               | Flavonoids            | 51100   | 42300   | 59900   | 87000   | 82000   | 81300   | 13300   | 16900   | 17200   |
| 130 | 547.11 | 549.124 | [M-2H] <sup>-</sup> | C25H25O14 <sup>+</sup> | Peonidin 3-O-(6"-malonylglucoside)     | Flavonoids            | 64600   | 52700   | 59800   | 64700   | 64200   | 64700   | 21200   | 53100   | 26400   |
| 131 | 607.1  | 608.146 | [M-H] <sup>-</sup>  | C28H32O15              | Chrysoeriol 7-O-rutinoside             | Flavonoids            | 60700   | 81100   | 61300   | 129000  | 109000  | 116000  | 9       | 9       | 9       |
| 132 | 475.1  | 476.076 | [M-H] <sup>-</sup>  | C22H20O12              | Chrysoeriol O-glucuronic acid          | Flavonoids            | 1050000 | 1010000 | 1050000 | 2020000 | 1620000 | 2060000 | 7270    | 7030    | 10600   |
| 133 | 521.1  | 522.08  | [M-H] <sup>-</sup>  | C23H22O14              | Tricin O-saccharic acid                | Flavonoids            | 664000  | 758000  | 634000  | 217000  | 191000  | 165000  | 1400000 | 1530000 | 1630000 |
| 134 | 505.1  | 506.085 | [M-H] <sup>-</sup>  | C23H22O13              | Tricin O-glucuronic acid               | Flavonoids            | 383000  | 397000  | 416000  | 832000  | 656000  | 829000  | 9       | 9       | 9       |
| 135 | 499.2  | 500.128 | [M-H] <sup>-</sup>  | C22H28O13              | 3-O-p-coumaroyl quinic acid O-hexoside | Phenolic acids        | 5610    | 6780    | 6010    | 7540    | 8880    | 6780    | 9       | 9       | 9       |

|     |        |         |        |               |                                                             |                   |         |         |         |         |              |         |         |         |         |
|-----|--------|---------|--------|---------------|-------------------------------------------------------------|-------------------|---------|---------|---------|---------|--------------|---------|---------|---------|---------|
| 136 | 481.1  | 482.12  | [M-H]- | C22H26O<br>12 | 5-O-p-Coumaroyl<br>shikimic<br>acid<br>O-hexoside           | Phenolic<br>acids | 12300   | 30000   | 19600   | 29000   | 23400        | 29900   | 9       | 9       | 9       |
| 137 | 337.1  | 338.085 | [M-H]- | C16H18O<br>8  | 3-O-p-Coumaroyl<br>quinic acid                              | Phenolic<br>acids | 46100   | 46900   | 47900   | 59400   | 57200        | 43100   | 7380    | 8620    | 10400   |
| 138 | 359.1  | 360.088 | [M-H]- | C15H20O<br>10 | Syringic<br>acid<br>O-glucoside                             | Phenolic<br>acids | 391000  | 424000  | 492000  | 660000  | 732000       | 670000  | 101000  | 83300   | 99800   |
| 139 | 329.1  | 330.061 | [M-H]- | C17H14O<br>7  | Di-O-methylquercetin                                        | Flavonoids        | 6830000 | 6990000 | 6740000 | 9440000 | 1030000<br>0 | 9490000 | 1410000 | 3890000 | 1710000 |
| 140 | 285    | 286.038 | [M-H]- | C15H10O<br>6  | Luteolin                                                    | Flavonoids        | 2880    | 3560    | 4230    | 5650    | 3070         | 3490    | 9       | 9       | 9       |
| 141 | 123.04 | 122.032 | [M+H]+ | C7H6O2        | Benzoic acid                                                | Phenolic<br>acids | 108000  | 109000  | 105000  | 177000  | 175000       | 153000  | 9       | 9       | 9       |
| 142 | 165.03 | 166.021 | [M-H]- | C8H6O4        | Terephthalic acid                                           | Phenolic<br>acids | 2780000 | 2550000 | 2890000 | 2360000 | 2340000      | 2510000 | 2910000 | 2710000 | 3240000 |
| 143 | 431.11 | 432.088 | [M-H]- | C21H20O<br>10 | Kaempferol<br>7-O-rhamnoside                                | Flavonoids        | 10900   | 9120    | 9860    | 9       | 9            | 9       | 53100   | 13900   | 11000   |
| 144 | 165.05 | 164.041 | [M+H]+ | C9H8O3        | p-Coumaric acid                                             | Phenolic<br>acids | 157000  | 170000  | 167000  | 224000  | 254000       | 238000  | 46700   | 53500   | 52000   |
| 145 | 147.12 | 146.106 | [M+H]+ | C7H16NO<br>2  | Acetylcholine                                               | Alkaloids         | 19200   | 21500   | 20000   | 27900   | 34200        | 32900   | 10300   | 9320    | 13400   |
| 146 | 138.07 | 137.064 | [M+H]+ | C7H9N2O       | 3-Carbamyl-1-methylp<br>yridinium(1-Methylnic<br>otinamide) | Others            | 14200   | 9560    | 10900   | 17300   | 13400        | 13000   | 15300   | 14700   | 15600   |
| 147 | 138    | 137.042 | [M+H]+ | C7H7NO2       | Trigonelline                                                | Alkaloids         | 4590    | 5640    | 4780    | 6660    | 5800         | 8050    | 5580    | 5390    | 4650    |
| 148 | 139.1  | 138.026 | [M+H]+ | C7H6O3        | Protocatechuic<br>aldehyde                                  | Flavonoids        | 49100   | 83200   | 102000  | 141000  | 151000       | 124000  | 9       | 9       | 9       |
| 149 | 579.2  | 578.137 | [M+H]+ | C27H30O<br>14 | Kaempferol<br>3,7-dirhamnoside(Kae<br>mpferitrin)           | Flavonoids        | 256000  | 245000  | 258000  | 9       | 9            | 9       | 1420000 | 570000  | 303000  |
| 150 | 131    | 130.1   | [M+H]+ | C6H14N2<br>O  | N-Acetylputrescine                                          | Alkaloids         | 37000   | 34000   | 41300   | 23000   | 27400        | 20200   | 70700   | 57700   | 51300   |
| 151 | 207.1  | 208.064 | [M-H]- | C11H12O       | Sinapinaldehyde                                             | Phenolic          | 699000  | 764000  | 724000  | 661000  | 677000       | 665000  | 721000  | 765000  | 954000  |

|     |        |         |                    |                                                              |                                            |                             |         |         |         |         |         |         |         |         |         |
|-----|--------|---------|--------------------|--------------------------------------------------------------|--------------------------------------------|-----------------------------|---------|---------|---------|---------|---------|---------|---------|---------|---------|
|     |        |         |                    | 4                                                            |                                            | acids                       |         |         |         |         |         |         |         |         |         |
| 152 | 463.12 | 463.124 | [M] <sup>+</sup>   | C <sub>22</sub> H <sub>23</sub> O <sub>11</sub> <sup>+</sup> | Peonidin<br>3-O-glucoside                  | Flavonoids                  | 32400   | 26400   | 33000   | 38300   | 44600   | 45700   | 9       | 9       | 9       |
| 153 | 177.06 | 178.055 | [M-H] <sup>-</sup> | C <sub>10</sub> H <sub>10</sub> O <sub>3</sub>               | Riboprine                                  | Phenolic<br>acids           | 3200000 | 3340000 | 3500000 | 4330000 | 4290000 | 4230000 | 1670000 | 1890000 | 2280000 |
| 154 | 325.08 | 324.07  | [M+H] <sup>+</sup> | C <sub>15</sub> H <sub>16</sub> O <sub>8</sub>               | Skimmin                                    | Lignans<br>and<br>Coumarins | 2370000 | 2370000 | 2510000 | 2000000 | 2310000 | 2700000 | 1670000 | 2080000 | 1840000 |
| 155 | 163.1  | 162.061 | [M+H] <sup>+</sup> | C <sub>10</sub> H <sub>10</sub> O <sub>2</sub>               | 4-MethoxycinnaMalde<br>hyde                | Phenolic<br>acids           | 10900   | 12000   | 9280    | 9010    | 13200   | 9810    | 12900   | 11800   | 12000   |
| 156 | 625.18 | 625.177 | [M] <sup>+</sup>   | C <sub>28</sub> H <sub>33</sub> O <sub>16</sub> <sup>+</sup> | Peonidin<br>3,5-O-diglucoside<br>chloride  | Flavonoids                  | 9230    | 8180    | 7710    | 4010    | 5840    | 6260    | 12700   | 9200    | 13900   |
| 157 | 413.12 | 414.113 | [M-H] <sup>-</sup> | C <sub>22</sub> H <sub>22</sub> O <sub>8</sub>               | 1-O-Feruloyl-3-O-p-C<br>oumaroyl glycerol  | Phenolic<br>acids           | 2470    | 2600    | 3010    | 2790    | 3090    | 3090    | 1650    | 2390    | 2090    |
| 158 | 445.1  | 446.068 | [M-H] <sup>-</sup> | C <sub>21</sub> H <sub>18</sub> O <sub>11</sub>              | Rhein-8-O-D-glucopyr<br>anoside            | Quinones                    | 1990000 | 2070000 | 1860000 | 3660000 | 3210000 | 3170000 | 390000  | 738000  | 742000  |
| 159 | 315.07 | 316.065 | [M-H] <sup>-</sup> | C <sub>13</sub> H <sub>16</sub> O <sub>9</sub>               | Protocatechuic<br>acid-4-glucoside         | Phenolic<br>acids           | 6110000 | 5480000 | 6560000 | 6590000 | 6010000 | 6990000 | 4030000 | 4860000 | 6280000 |
| 160 | 699.25 | 700.221 | [M-H] <sup>-</sup> | C <sub>32</sub> H <sub>44</sub> O <sub>17</sub>              | Olivin Diglucoside                         | Lignans<br>and<br>Coumarins | 1310000 | 1310000 | 1360000 | 1710000 | 1930000 | 1810000 | 356000  | 345000  | 416000  |
| 161 | 549.16 | 550.177 | [M-H] <sup>-</sup> | C <sub>27</sub> H <sub>34</sub> O <sub>12</sub>              | Eucommin A                                 | Lignans<br>and<br>Coumarins | 63800   | 64400   | 65900   | 42500   | 36100   | 39400   | 93000   | 115000  | 103000  |
| 162 | 535.18 | 536.163 | [M-H] <sup>-</sup> | C <sub>26</sub> H <sub>32</sub> O <sub>12</sub>              | 1-Hydroxyterpinin<br>monoglucoside         | Lignans<br>and<br>Coumarins | 187000  | 166000  | 185000  | 313000  | 256000  | 234000  | 72600   | 77000   | 76000   |
| 163 | 519.16 | 520.168 | [M-H] <sup>-</sup> | C <sub>26</sub> H <sub>32</sub> O <sub>11</sub>              | Terpineol<br>monoglucoside                 | Lignans<br>and<br>Coumarins | 356000  | 391000  | 369000  | 203000  | 198000  | 217000  | 592000  | 629000  | 506000  |
| 164 | 325.09 | 326.085 | [M-H] <sup>-</sup> | C <sub>15</sub> H <sub>18</sub> O <sub>8</sub>               | 1-O-[(E)-p-Cumaroyl]-<br>β-D-glucopyranose | Phenolic<br>acids           | 2090000 | 1870000 | 1970000 | 2380000 | 3100000 | 2900000 | 905000  | 899000  | 869000  |

|     |        |         |        |               |                                                        |                             |              |              |              |              |              |              |              |              |              |
|-----|--------|---------|--------|---------------|--------------------------------------------------------|-----------------------------|--------------|--------------|--------------|--------------|--------------|--------------|--------------|--------------|--------------|
| 165 | 341.08 | 342.079 | [M-H]- | C15H18O<br>9  | 1-O-[(E)-Caffeoyl]- $\beta$ -<br>D-glucopyranose       | Phenolic<br>acids           | 3880000      | 4230000      | 4220000      | 1340000      | 1580000      | 1680000      | 6290000      | 7560000      | 5970000      |
| 166 | 337.09 | 338.085 | [M-H]- | C16H18O<br>8  | 3-O-(E)-p-Coumaroyl<br>quinic acid                     | Phenolic<br>acids           | 23600        | 15600        | 19000        | 47700        | 49700        | 40000        | 8670         | 7590         | 11900        |
| 167 | 517.2  | 518.137 | [M-H]- | C22H30O<br>14 | Sibiricose A5                                          | Phenolic<br>acids           | 250000       | 252000       | 272000       | 179000       | 181000       | 241000       | 348000       | 346000       | 431000       |
| 168 | 405.1  | 406.073 | [M-H]- | C19H18O<br>10 | Lancerin                                               | Phenolic<br>acids           | 258000       | 188000       | 222000       | 217000       | 180000       | 191000       | 148000       | 119000       | 126000       |
| 169 | 187.1  | 188.041 | [M-H]- | C11H8O3       | Ayapin                                                 | Lignans<br>and<br>Coumarins | 102000       | 107000       | 100000       | 111000       | 131000       | 119000       | 93100        | 96800        | 82900        |
| 170 | 417.2  | 418.142 | [M-H]- | C22H26O<br>8  | (+)-Syringaresinol                                     | Lignans<br>and<br>Coumarins | 74800        | 67600        | 71400        | 93800        | 92800        | 97800        | 8250         | 7110         | 9570         |
| 171 | 387.14 | 388.133 | [M-H]- | C21H24O<br>7  | Medioresinol                                           | Lignans<br>and<br>Coumarins | 37500        | 37400        | 33800        | 50300        | 46000        | 45500        | 6250         | 7490         | 6550         |
| 172 | 329.1  | 330.113 | [M-H]- | C15H22O<br>8  | 3,4,5-Trimethoxypheny<br>l- $\beta$ -D-Glucopyranoside | Phenolic<br>acids           | 1860000<br>0 | 1700000<br>0 | 1840000<br>0 | 2510000<br>0 | 2240000<br>0 | 2370000<br>0 | 1160000<br>0 | 1030000<br>0 | 1060000<br>0 |
| 173 | 477.1  | 478.125 | [M-H]- | C23H26O<br>11 | 3,5-Di-O-galloylshikim<br>ic acid                      | Phenolic<br>acids           | 42200        | 39100        | 39900        | 48400        | 49800        | 47900        | 8000         | 12400        | 16500        |
| 174 | 255.23 | 256.219 | [M-H]- | C16H32O<br>2  | Hexadecanoic acid                                      | Phenolic<br>acids           | 3910000<br>0 | 4120000<br>0 | 4460000<br>0 | 4150000<br>0 | 4000000<br>0 | 5140000<br>0 | 3940000<br>0 | 3840000<br>0 | 3800000<br>0 |
| 175 | 609.1  | 610.126 | [M-H]- | C27H30O<br>16 | Bioquercetin                                           | Flavonoids                  | 8270         | 8140         | 9170         | 9            | 9            | 9            | 3630         | 6810         | 8310         |
| 176 | 389.1  | 390.096 | [M-H]- | C16H22O<br>11 | Deacetylasperulosidic<br>acid                          | Terpenoids                  | 6970         | 7050         | 6540         | 8220         | 6690         | 11400        | 3970         | 4590         | 4460         |
| 177 | 487.3  | 488.317 | [M-H]- | C30H48O<br>5  | Rutundic acid                                          | Terpenoids                  | 44800        | 46200        | 44100        | 50100        | 44400        | 51700        | 22000        | 40900        | 22500        |
| 178 | 577.2  | 578.137 | [M-H]- | C27H30O<br>14 | Kaempferol-3,7-O- $\alpha$ -L<br>-rhamnoside           | Flavonoids                  | 58700        | 65700        | 66900        | 9            | 9            | 9            | 174000       | 76000        | 55500        |
| 179 | 331.1  | 332.059 | [M-H]- | C13H16O<br>10 | Glucogallin                                            | Phenolic<br>acids           | 120000       | 201000       | 169000       | 101000       | 343000       | 329000       | 128000       | 120000       | 83700        |

|     |        |         |        |               |                                                                   |                |              |              |              |         |         |         |              |              |              |
|-----|--------|---------|--------|---------------|-------------------------------------------------------------------|----------------|--------------|--------------|--------------|---------|---------|---------|--------------|--------------|--------------|
| 180 | 415.1  | 416.128 | [M-H]- | C22H24O<br>8  | Apigenin-3-O- $\alpha$ -L-rhamnoside                              | Flavonoids     | 20200        | 20100        | 21400        | 26100   | 21000   | 22900   | 22700        | 19900        | 18700        |
| 181 | 237.1  | 238.073 | [M-H]- | C12H14O<br>5  | Methyl sinapate                                                   | Phenolic acids | 4600         | 5190         | 3990         | 3360    | 2670    | 1880    | 8390         | 5020         | 7210         |
| 182 | 547.2  | 548.146 | [M-H]- | C23H32O<br>15 | $\beta$ -D-Furanofructosyl- $\alpha$ -D-(3-mustard acyl)glucoside | Phenolic acids | 62400        | 70100        | 72100        | 106000  | 98600   | 108000  | 7960         | 6170         | 5450         |
| 183 | 327.1  | 328.133 | [M-H]- | C16H24O<br>7  | 3-Hydroxy-4-isopropyl benzylalcohol 3-glucoside                   | Phenolic acids | 191000       | 163000       | 155000       | 295000  | 283000  | 261000  | 9            | 9            | 9            |
| 184 | 445.08 | 446.068 | [M-H]- | C21H18O<br>11 | Apigenin-7-O- $\beta$ -D-glucuronide                              | Flavonoids     | 437000       | 380000       | 423000       | 945000  | 763000  | 759000  | 11600        | 17600        | 21100        |
| 185 | 455.35 | 456.329 | [M-H]- | C30H48O<br>3  | 24,30-Dihydroxy-12(13)-enolupinol                                 | Terpenoids     | 144000       | 113000       | 109000       | 225000  | 185000  | 291000  | 50500        | 62000        | 51100        |
| 186 | 461.08 | 462.062 | [M-H]- | C21H18O<br>12 | Tetrahydroxy-flavone-7-O- $\beta$ -D-glucuronide                  | Flavonoids     | 132000       | 158000       | 194000       | 347000  | 340000  | 341000  | 9            | 9            | 9            |
| 187 | 469.33 | 470.309 | [M-H]- | C30H46O<br>4  | 2,3-Dihydroxy 5(6),12(13)diene ursolic acid                       | Terpenoids     | 6520         | 6670         | 6820         | 4090    | 4520    | 3740    | 9960         | 11100        | 7410         |
| 188 | 471.35 | 472.323 | [M-H]- | C30H48O<br>4  | 3,24-Dihydroxy-17,21-semiacetal-12(13)oleanolic fruit             | Terpenoids     | 7390000      | 8990000      | 8720000      | 4900000 | 4690000 | 5020000 | 9670000      | 1430000<br>0 | 1140000<br>0 |
| 189 | 471.35 | 472.323 | [M-H]- | C30H48O<br>4  | 2-Hydroxyoleanolic acid                                           | Terpenoids     | 8810000      | 1000000<br>0 | 9150000      | 4660000 | 5410000 | 5410000 | 1070000<br>0 | 1630000<br>0 | 1200000<br>0 |
| 190 | 521.13 | 522.114 | [M-H]- | C24H26O<br>13 | Rosmarinyl Glucoside                                              | Phenolic acids | 810000       | 1080000      | 1090000      | 1740000 | 1080000 | 1570000 | 283000       | 272000       | 375000       |
| 191 | 569.2  | 570.132 | [M-H]- | C25H30O<br>15 | Oleuropeinic acid                                                 | Terpenoids     | 23100        | 38300        | 23900        | 16600   | 13700   | 13200   | 30100        | 28500        | 28800        |
| 192 | 623.2  | 624.175 | [M-H]- | C29H36O<br>15 | Verbascoside                                                      | Phenolic acids | 2940000<br>0 | 2990000<br>0 | 2870000<br>0 | 7180000 | 6980000 | 8720000 | 4950000<br>0 | 4770000<br>0 | 3690000<br>0 |
| 193 | 403.1  | 404.111 | [M-H]- | C17H24O<br>11 | Oleoside 11-methyl ester                                          | Phenolic acids | 890000       | 955000       | 1030000      | 1200000 | 1140000 | 1220000 | 482000       | 491000       | 484000       |
| 194 | 301.07 | 300.053 | [M+H]+ | C16H12O       | Hispidulin                                                        | Flavonoids     | 58100        | 65300        | 60000        | 81700   | 70200   | 70500   | 9            | 9            | 9            |

|     |        |         |                    |               |                                                            |                             |         |         |         |         |         |         |         |         |         |
|-----|--------|---------|--------------------|---------------|------------------------------------------------------------|-----------------------------|---------|---------|---------|---------|---------|---------|---------|---------|---------|
|     |        |         |                    | 6             |                                                            |                             |         |         |         |         |         |         |         |         |         |
| 195 | 331.08 | 330.061 | [M+H] <sup>+</sup> | C17H14O<br>7  | Jaceosidin                                                 | Flavonoids                  | 7520    | 8640    | 7230    | 9280    | 9410    | 10500   | 9       | 9       | 9       |
| 196 | 463.08 | 462.062 | [M+H] <sup>+</sup> | C21H18O<br>12 | Scutellarin                                                | Flavonoids                  | 215000  | 190000  | 251000  | 376000  | 340000  | 338000  | 9       | 9       | 9       |
| 197 | 269.1  | 268.081 | [M+H] <sup>+</sup> | C13H16O<br>6  | 2-Feruloyl-sn-glycerol                                     | Phenolic<br>acids           | 62600   | 89700   | 101000  | 102000  | 120000  | 115000  | 48200   | 43900   | 54400   |
| 198 | 519.11 | 518.085 | [M+H] <sup>+</sup> | C24H22O<br>13 | Malonyglygenistin                                          | Flavonoids                  | 56300   | 57600   | 62900   | 86000   | 99800   | 89400   | 9       | 9       | 6800    |
| 199 | 223.06 | 222.044 | [M+H] <sup>+</sup> | C11H10O<br>5  | Fraxidin                                                   | Lignans<br>and<br>Coumarins | 17300   | 18300   | 17600   | 24900   | 21300   | 19800   | 11400   | 16700   | 18300   |
| 200 | 301.07 | 300.053 | [M+H] <sup>+</sup> | C16H12O<br>6  | Pratensein                                                 | Flavonoids                  | 61400   | 62400   | 63200   | 84400   | 73400   | 69200   | 9       | 9       | 9       |
| 201 | 463.08 | 462.079 | [M+H] <sup>+</sup> | C25H18O<br>9  | Luteolin-7-O-glucuroni<br>de                               | Flavonoids                  | 184000  | 216000  | 181000  | 370000  | 314000  | 294000  | 9       | 9       | 16200   |
| 202 | 463.12 | 462.096 | [M+H] <sup>+</sup> | C22H22O<br>11 | Diosmetin-7-O-galacto<br>side                              | Flavonoids                  | 140000  | 147000  | 144000  | 265000  | 246000  | 243000  | 13800   | 18400   | 18200   |
| 203 | 477.1  | 476.076 | [M+H] <sup>+</sup> | C22H20O<br>12 | Diosmetin-7-O-glucuro<br>nide                              | Flavonoids                  | 2170000 | 2730000 | 3040000 | 5060000 | 4110000 | 4940000 | 23900   | 31000   | 35500   |
| 204 | 549.12 | 548.094 | [M+H] <sup>+</sup> | C25H24O<br>14 | Diosmetin-7-O-(6'-O-<br>malonyl)- $\beta$ -D-glucosid<br>e | Flavonoids                  | 8070    | 11200   | 8290    | 13200   | 15300   | 12900   | 9       | 9       | 9       |
| 205 | 595.16 | 594.132 | [M+H] <sup>+</sup> | C27H30O<br>15 | Luteolin-7-O-rutinosid<br>e                                | Flavonoids                  | 35100   | 37400   | 41100   | 9       | 9       | 9       | 219000  | 71400   | 50700   |
| 206 | 609.18 | 608.146 | [M+H] <sup>+</sup> | C28H32O<br>15 | Diosmetin-7-O-rutin                                        | Flavonoids                  | 44600   | 48500   | 49500   | 63300   | 57500   | 66800   | 9330    | 60000   | 11100   |
| 207 | 331.22 | 330.199 | [M+H] <sup>+</sup> | C21H30O<br>3  | Tussilagonone                                              | Terpenoids                  | 14700   | 17100   | 16100   | 27100   | 25000   | 20200   | 6190    | 7650    | 8860    |
| 208 | 479.15 | 478.125 | [M+H] <sup>+</sup> | C23H26O<br>11 | Calceolarioside A                                          | Phenolic<br>acids           | 1650000 | 1840000 | 1890000 | 331000  | 317000  | 322000  | 5020000 | 4520000 | 3410000 |
| 209 | 536.19 | 518.137 | [M+NH4]<br>+       | C22H30O<br>14 | 3'-O-D-glucosylgentio<br>picroside                         | Terpenoids                  | 8530    | 12500   | 15700   | 15400   | 16200   | 18700   | 9       | 9       | 9       |

|     |        |         |                    |                             |                                                                                                                         |                   |         |         |         |         |         |         |              |              |              |
|-----|--------|---------|--------------------|-----------------------------|-------------------------------------------------------------------------------------------------------------------------|-------------------|---------|---------|---------|---------|---------|---------|--------------|--------------|--------------|
| 210 | 637.17 | 636.14  | [M+H] <sup>+</sup> | C29H32O<br>16               | Deglucosylgelidoside                                                                                                    | Terpenoids        | 8980    | 11000   | 16900   | 13400   | 10900   | 12400   | 11900        | 14300        | 10700        |
| 211 | 331.17 | 330.113 | [M+H] <sup>+</sup> | C15H22O<br>8                | Bartsioside                                                                                                             | Others            | 158000  | 113000  | 146000  | 243000  | 247000  | 275000  | 9            | 9            | 9            |
| 212 | 609.18 | 608.146 | [M+H] <sup>+</sup> | C28H32O<br>15               | Neodiosmin                                                                                                              | Flavonoids        | 36300   | 59800   | 51100   | 70100   | 65900   | 76300   | 23100        | 58900        | 9            |
| 213 | 595.17 | 594.132 | [M+H] <sup>+</sup> | C27H30O<br>15               | Vitexin-2-O-D-glucopy<br>ranoside                                                                                       | Flavonoids        | 15500   | 27200   | 22400   | 21700   | 22200   | 25200   | 21100        | 20200        | 18200        |
| 214 | 153.05 | 152.041 | [M+H] <sup>+</sup> | C8H8O3                      | Dihydro-p-coumarat                                                                                                      | Phenolic<br>acids | 31000   | 27300   | 26200   | 45700   | 47100   | 50600   | 8000         | 8950         | 9830         |
| 215 | 314.1  | 313.117 | [M+H] <sup>+</sup> | C18H19N<br>O4               | Methoxy-N-Caffeoylty<br>ramine                                                                                          | Alkaloids         | 12000   | 10900   | 10800   | 19600   | 14200   | 16000   | 5720         | 5020         | 6290         |
| 216 | 639.2  | 638.189 | [M+H] <sup>+</sup> | C30H38O<br>15               | Cistanoside C                                                                                                           | Phenolic<br>acids | 130000  | 167000  | 187000  | 19700   | 11700   | 34800   | 370000       | 536000       | 278000       |
| 217 | 472.21 | 472.191 | [M] <sup>+</sup>   | C22H34N<br>O10 <sup>+</sup> | Sinapine glucoside                                                                                                      | Alkaloids         | 47800   | 49300   | 58200   | 9       | 9       | 9       | 323000       | 43500        | 21000        |
| 218 | 478.29 | 477.253 | [M+H] <sup>+</sup> | C23H44N<br>O7P              | 3-((2-Aminoethoxy)(h<br>ydroxy)phosphoryl]ox<br>y)-2-12-octadecadieno<br>ate                                            | Alkaloids         | 6660000 | 6560000 | 6460000 | 2310000 | 2320000 | 2180000 | 1340000<br>0 | 1370000<br>0 | 1290000<br>0 |
| 219 | 672.42 | 671.363 | [M+H] <sup>+</sup> | C31H61O<br>14N              | 3-Hydroxypropyl<br>palmitate<br>glc-glucosamine                                                                         | Alkaloids         | 3860000 | 3920000 | 3990000 | 4390000 | 4130000 | 4070000 | 2250000      | 2700000      | 2300000      |
| 220 | 454.3  | 453.253 | [M+H] <sup>+</sup> | C21H44N<br>O7P              | 3-((2-Aminoethoxy)(h<br>ydroxy)phosphoryl]ox<br>y)-2-hydroxypropyl<br>palmitate                                         | Alkaloids         | 485000  | 391000  | 368000  | 199000  | 212000  | 212000  | 709000       | 1160000      | 604000       |
| 221 | 518.32 | 517.276 | [M+H] <sup>+</sup> | C21H48N<br>3O9P             | Bis(N,N-diethylethana<br>minium)-2-acetamido-<br>1,5-anhydro-2-deoxy-1<br>-[-hydroxy(phosphonat<br>o)methyl]-D-glucitol | Alkaloids         | 207000  | 233000  | 219000  | 213000  | 221000  | 185000  | 202000       | 276000       | 236000       |
| 222 | 544.34 | 543.296 | [M+H] <sup>+</sup> | C28H50N                     | Propyl2-(trimethylam                                                                                                    | Others            | 57800   | 67300   | 69400   | 65400   | 77500   | 62800   | 58000        | 77200        | 66700        |

|     |        |         |                    |           |                                                                          |            |         |         |         |         |         |         |         |         |         |  |
|-----|--------|---------|--------------------|-----------|--------------------------------------------------------------------------|------------|---------|---------|---------|---------|---------|---------|---------|---------|---------|--|
|     |        |         |                    | O7P       | monio)ethyl phosphate                                                    |            |         |         |         |         |         |         |         |         |         |  |
| 223 | 120.08 | 119.067 | [M+H] <sup>+</sup> | C8H9N     | N-Benzylmethylene isomethylamine                                         | Alkaloids  | 3020000 | 3320000 | 3180000 | 4030000 | 3710000 | 3980000 | 3250000 | 2600000 | 3070000 |  |
| 224 | 653.1  | 652.1   | [M+H] <sup>+</sup> | C28H28O18 | Chrysoeriol-7-O-[β-D-glucuronopyranosyl-(1→2)-O-β-D-glucuronopyranoside] | Flavonoids | 469000  | 442000  | 536000  | 805000  | 653000  | 545000  | 9       | 9       | 9       |  |
| 225 | 623.1  | 622.091 | [M+H] <sup>+</sup> | C27H26O17 | Apigenin-7-O-[β-D-glucuronopyranosyl(1→2)-O-β-D-glucuronopyranoside)     | Flavonoids | 748000  | 701000  | 806000  | 1130000 | 963000  | 1050000 | 9       | 9       | 9       |  |
| 226 | 627.2  | 626.12  | [M+H] <sup>+</sup> | C27H30O17 | 6-Hydroxykaempferol-3,6-O-Diglucoside                                    | Flavonoids | 21300   | 22200   | 30000   | 24200   | 19900   | 17700   | 30500   | 24800   | 18500   |  |
| 227 | 361    | 362     | [M-H] <sup>-</sup> | C15H22O10 | Catalpol                                                                 | Others     | 405000  | 590000  | 555000  | 542000  | 710000  | 604000  | 505000  | 736000  | 588000  |  |
| 228 | 685    | 686     | [M-H] <sup>-</sup> | C27H42O20 | Rehmannioside D                                                          | Terpenoids | 9120000 | 7830000 | 8680000 | 4510000 | 4010000 | 3820000 | 9900000 | 9350000 | 8990000 |  |

Table. S2. KEGG annotation of 228 secondary metabolites

| No. | Compounds                            | Class          | cpd_ID | kegg_map |
|-----|--------------------------------------|----------------|--------|----------|
| 1   | Isorhamnetin-3-O-rutinoside          | Flavonoids     | --     | --       |
| 2   | 3-O-Galloyl-β-D-glucose              | Tannins        | --     | --       |
| 3   | 2-O-Galloyl-β-D-glucose              | Tannins        | --     | --       |
| 4   | Gallacetophenone                     | Others         | --     | --       |
| 5   | 6'-O-glucosylaucubin                 | Others         | --     | --       |
| 6   | Cistanoside F                        | Phenolic acids | --     | --       |
| 7   | Limocitrin-O-rhamnoside-O-rhamnoside | Flavonoids     | --     | --       |
| 8   | Crenatine                            | Alkaloids      | --     | --       |
| 9   | Verbaside                            | Phenolic acids | --     | --       |
| 10  | β-Oxoacteoside                       | Others         | --     | --       |
| 11  | Cistanoside D                        | Others         | --     | --       |

|    |                                                        |                       |        |    |
|----|--------------------------------------------------------|-----------------------|--------|----|
| 12 | Isoacteoside                                           | Others                | --     | -- |
| 13 | 4-Hydroxy-3-methoxycinnamaldehyde                      | Phenolic acids        | --     | -- |
| 14 | Madasiatic acid                                        | Terpenoids            | --     | -- |
| 15 | Corosolic acid                                         | Terpenoids            | --     | -- |
| 16 | Roseoside                                              | Flavonoids            | --     | -- |
| 17 | Phytolaccagenin                                        | Terpenoids            | --     | -- |
| 18 | 5-(2-Hydroxyethyl)-2-O-glucosylohenol                  | Phenolic acids        | --     | -- |
| 19 | 4,5,6-Trihydroxy-2-cyclohexen-1-ylideneacetone nitrile | Alkaloids             | --     | -- |
| 20 | Ehretioside                                            | Alkaloids             | --     | -- |
| 21 | Tababiphenyl C                                         | Others                | --     | -- |
| 22 | Ditartaroyl-hydroxycoumarin                            | Phenolic acids        | --     | -- |
| 23 | Isorhamnetin acetyl hexoside                           | Flavonoids            | --     | -- |
| 24 | Maleoyl-caffeoylquinic acid                            | Phenolic acids        | --     | -- |
| 25 | Ursolic acid-OCH <sub>3</sub>                          | Terpenoids            | --     | -- |
| 26 | Feruloylmalic acid                                     | Phenolic acids        | --     | -- |
| 27 | Aracarpene 1                                           | Flavonoids            | --     | -- |
| 28 | 3-O-(2-O-Acetyl-β-D-glucopyranosyl)oleanolic acid      | Terpenoids            | --     | -- |
| 29 | Methylquercetin rha                                    | Flavonoids            | --     | -- |
| 30 | Syringaresinol-4'-O-β-D-monO-glucoside                 | Lignans and Coumarins | --     | -- |
| 31 | Kaempferol 3-glucuronide-7-glucoside                   | Flavonoids            | --     | -- |
| 32 | Apigenin-7-O-diglucuronide                             | Flavonoids            | --     | -- |
| 33 | Tricin                                                 | Flavonoids            | C10193 | -- |
| 34 | Kaempferol glc-rha                                     | Flavonoids            | --     | -- |
| 35 | (+)-Medioresinol-aceGlu                                | Lignans and Coumarins | --     | -- |
| 36 | Pinoresinol-Hexose                                     | Lignans and Coumarins | --     | -- |
| 37 | Pinoresinol-acetylglucose                              | Lignans and Coumarins | --     | -- |
| 38 | Syringaresinol-Hex                                     | Lignans and Coumarins | --     | -- |
| 39 | Syringaresinol-aceGlu                                  | Lignans and Coumarins | --     | -- |
| 40 | Rehmapicroside                                         | Others                | --     | -- |
| 41 | Rehmaglutoside D                                       | Terpenoids            | --     | -- |

|    |                                     |                       |        |                                                                                                                                                                                                                                                                         |
|----|-------------------------------------|-----------------------|--------|-------------------------------------------------------------------------------------------------------------------------------------------------------------------------------------------------------------------------------------------------------------------------|
| 42 | Anabasine-Hexose                    | Alkaloids             | --     | --                                                                                                                                                                                                                                                                      |
| 43 | Octadecenoic amide                  | Others                | --     | --                                                                                                                                                                                                                                                                      |
| 44 | p-Coumaric acid-O-glycoside         | Phenolic acids        | --     | --                                                                                                                                                                                                                                                                      |
| 45 | Feruloyl glucose                    | Phenolic acids        | C17759 | --                                                                                                                                                                                                                                                                      |
| 46 | Isosinapic acid-hexoside            | Phenolic acids        | --     | --                                                                                                                                                                                                                                                                      |
| 47 | 6,7,8-Tetrahydroxy-5-methoxyflavone | Flavonoids            | --     | --                                                                                                                                                                                                                                                                      |
| 48 | Coniferaldehyde                     | Phenolic acids        | C02666 | ko00940,ko01061,ko01100,ko01110                                                                                                                                                                                                                                         |
| 49 | Ferulic acid                        | Phenolic acids        | C01494 | ko00940,ko01061,ko01100,ko01110                                                                                                                                                                                                                                         |
| 50 | Spermine                            | Alkaloids             | C00750 | ko00330,ko00410,ko00480,ko01100,ko04976                                                                                                                                                                                                                                 |
| 51 | Syringic acid                       | Phenolic acids        | C10833 | ko00627,ko01120                                                                                                                                                                                                                                                         |
| 52 | Vanillic acid                       | Phenolic acids        | C06672 | ko00627,ko01120                                                                                                                                                                                                                                                         |
| 53 | Baicalin                            | Flavonoids            | --     | --                                                                                                                                                                                                                                                                      |
| 54 | Diosmetin                           | Flavonoids            | --     | --                                                                                                                                                                                                                                                                      |
| 55 | Coniferyl alcohol                   | Phenolic acids        | C00590 | ko00940,ko00998,ko01061,ko01100,ko01110                                                                                                                                                                                                                                 |
| 56 | (+)-Piperitol                       | Lignans and Coumarins | --     | --                                                                                                                                                                                                                                                                      |
| 57 | Pinoresinol                         | Lignans and Coumarins | --     | --                                                                                                                                                                                                                                                                      |
| 58 | Indole-5-carboxylic acid            | Alkaloids             | --     | --                                                                                                                                                                                                                                                                      |
| 59 | Indole-3-carboxaldehyde             | Alkaloids             | C08493 | --                                                                                                                                                                                                                                                                      |
| 60 | Pelargonin chloride                 | Flavonoids            | C08725 | ko00942                                                                                                                                                                                                                                                                 |
| 61 | 2,5-Dihydroxybenzoic acid           | Phenolic acids        | C00628 | ko00350,ko00362,ko00626,ko01100,ko01120                                                                                                                                                                                                                                 |
| 62 | Succinic acid                       | Others                | C00042 | ko00020,ko00190,ko00250,ko00310,ko00350,ko00360,ko00361,ko00620,ko00630,ko00640,ko00650,ko00720,ko00760,ko00920,ko01060,ko01061,ko01062,ko01063,ko01064,ko01065,ko01066,ko01070,ko01100,ko01110,ko01120,ko01130,ko01200,ko01220,ko02020,ko04024,ko04727,ko04922,ko05230 |
| 63 | L-(-)-Malic acid                    | Others                | C00497 | ko00650,ko01100                                                                                                                                                                                                                                                         |
| 64 | Citric Acid                         | Others                | C00158 | ko00020,ko00250,ko00630,ko00720,ko01060,ko01061,ko01062,ko01063,ko01064,ko01065,ko01066,ko01070,ko01100,ko01110,ko01120,ko01130,ko01200,ko01210,ko01230,ko02020,ko04742,ko04922,ko05230                                                                                 |
| 65 | D-Xylonic acid                      | Others                | --     | --                                                                                                                                                                                                                                                                      |
| 66 | Vanillin                            | Phenolic acids        | C00755 | ko00627,ko00999,ko01061,ko01063,ko01100,ko01110,ko0112                                                                                                                                                                                                                  |

|    |                                            |                       |        |                                                                                                 |
|----|--------------------------------------------|-----------------------|--------|-------------------------------------------------------------------------------------------------|
|    |                                            |                       |        | 0                                                                                               |
| 67 | Phenethylamine                             | Others                | C05332 | ko00360,ko01100                                                                                 |
| 68 | 4-Hydroxybenzaldehyde                      | Phenolic acids        | C00633 | ko00363,ko00623,ko00627,ko01061,ko01100,ko01120                                                 |
| 69 | N-Acetyl-5-hydroxytryptamine               | Alkaloids             | C00978 | ko00380,ko01100                                                                                 |
| 70 | O-Phosphorylethanolamine                   | Others                | --     | --                                                                                              |
| 71 | Dihydromyricetin(Ampelopsin)               | Flavonoids            | C02906 | ko00941,ko01110                                                                                 |
| 72 | 4-Hydroxybenzoic acid                      | Phenolic acids        | C00156 | ko00130,ko00362,ko00363,ko00623,ko00627,ko00790,ko01061,ko01100,ko01110,ko01120,ko01220,ko07110 |
| 73 | Coniferin                                  | Phenolic acids        | C00761 | ko00940                                                                                         |
| 74 | p-Coumaryl alcohol                         | Phenolic acids        | C02646 | ko00940,ko01061,ko01100,ko01110                                                                 |
| 75 | N-Oleoylethanolamine                       | Others                | --     | --                                                                                              |
| 76 | Fraxetin                                   | Lignans and Coumarins | C09265 | --                                                                                              |
| 77 | Esculin(6,7-DihydroxyCoumarin-6-glucoside) | Lignans and Coumarins | C09264 | --                                                                                              |
| 78 | Robinin(Kaempferol-3-O-gal-rham-7-O-rham)  | Flavonoids            | C10178 | --                                                                                              |
| 79 | Apigenin 6,8-C-diglucoside                 | Flavonoids            | --     | --                                                                                              |
| 80 | Cistanoside A                              | Phenolic acids        | --     | --                                                                                              |
| 81 | 2'-Acetylacteoside                         | Phenolic acids        | --     | --                                                                                              |
| 82 | Methyl p-coumarate                         | Phenolic acids        | --     | --                                                                                              |
| 83 | Trans-4-Hydroxycinnamic Acid Methyl Ester  | Phenolic acids        | --     | --                                                                                              |
| 84 | Methyl ferulate                            | Phenolic acids        | --     | --                                                                                              |
| 85 | DL-2-Amino adipic acid                     | Alkaloids             | --     | --                                                                                              |
| 86 | Syringic Aldehyde                          | Phenolic acids        | --     | --                                                                                              |
| 87 | Trans-ferulic acid                         | Phenolic acids        | --     | --                                                                                              |
| 88 | Indole-3-carboxylic acid                   | Alkaloids             | --     | --                                                                                              |
| 89 | N-Feruloyltyramine                         | Alkaloids             | --     | --                                                                                              |
| 90 | Plantamajoside                             | Phenolic acids        | C10485 | --                                                                                              |
| 91 | Geniposidic acid                           | Terpenoids            | --     | --                                                                                              |
| 92 | Genipin 1-gentiobioside                    | Terpenoids            | C16965 | --                                                                                              |
| 93 | Aucubin                                    | Terpenoids            | C09771 | --                                                                                              |

|     |                                                       |                       |        |                                                         |
|-----|-------------------------------------------------------|-----------------------|--------|---------------------------------------------------------|
| 94  | Chrysophanic acid                                     | Quinones              | --     | --                                                      |
| 95  | Diosmin                                               | Flavonoids            | C10039 | --                                                      |
| 96  | D-Pinitol                                             | Others                | --     | --                                                      |
| 97  | Caffeic acid                                          | Phenolic acids        | C01197 | ko00940,ko01061,ko01100,ko01110,ko01220                 |
| 98  | Salidroside                                           | Phenolic acids        | C06046 | ko00350,ko01100                                         |
| 99  | Tyrosol                                               | Phenolic acids        | --     | --                                                      |
| 100 | Delphinidin chloride                                  | Flavonoids            | --     | --                                                      |
| 101 | Hypoglycyrrhizic acid( $\beta$ )                      | Terpenoids            | --     | --                                                      |
| 102 | 1-Methoxyphaseollin                                   | Others                | --     | --                                                      |
| 103 | Calceorioside B                                       | Phenolic acids        | --     | --                                                      |
| 104 | N-Acetyl- $\beta$ -D-mannosamine                      | Others                | --     | --                                                      |
| 105 | Homovanillic alcohol                                  | Phenolic acids        | --     | --                                                      |
| 106 | Peonidin O-hexoside                                   | Flavonoids            | --     | --                                                      |
| 107 | Aminopurine                                           | Alkaloids             | --     | --                                                      |
| 108 | Luteolin O-feruloylhexoside                           | Flavonoids            | --     | --                                                      |
| 109 | O-Feruloyl 4-hydroxycoumarin                          | Lignans and Coumarins | --     | --                                                      |
| 110 | Choline                                               | Alkaloids             | C00114 | ko00260,ko00564,ko01100,ko02010,ko04725,ko04976,ko05231 |
| 111 | N-p-Coumaroyl putrescine                              | Alkaloids             | C18326 | ko00330,ko01100                                         |
| 112 | N',N'',N'''-p-Coumaroyl-cinnamoyl-caffeoyl spermidine | Alkaloids             | --     | --                                                      |
| 113 | N-Sinapoyl agmatine                                   | Alkaloids             | --     | --                                                      |
| 114 | N',N''-p-Coumaroyl-feruloyl putrescine                | Alkaloids             | --     | --                                                      |
| 115 | Rosinidin O-hexoside                                  | Flavonoids            | --     | --                                                      |
| 116 | Syringetin 3-O-hexoside                               | Flavonoids            | --     | --                                                      |
| 117 | Chrysoeriol O-hexosyl-O-hexoside                      | Flavonoids            | --     | --                                                      |
| 118 | Chrysoeriol O-malonylhexoside                         | Flavonoids            | --     | --                                                      |
| 119 | C-Hexosyl-luteolin O-sinapic acid                     | Flavonoids            | --     | --                                                      |
| 120 | Tricin O-malonylhexoside                              | Flavonoids            | --     | --                                                      |
| 121 | Tricin 7-O-hexoside                                   | Flavonoids            | --     | --                                                      |
| 122 | Indole                                                | Alkaloids             | C00463 | ko00380,ko00400,ko00402,ko01100,ko01110,ko04974         |
| 123 | 10-Formyl-THF                                         | Alkaloids             | C00234 | ko00670,ko00720,ko00970,ko01100,ko01120,ko01200,ko0152  |

|     |                                                      |                       |        |                                                                                 |
|-----|------------------------------------------------------|-----------------------|--------|---------------------------------------------------------------------------------|
|     |                                                      |                       |        | 3                                                                               |
| 124 | Cocamidopropyl $\beta$ ine                           | Alkaloids             | --     | --                                                                              |
| 125 | 3,4-Dimethoxycinnamic acid                           | Phenolic acids        | --     | --                                                                              |
| 126 | 4-hydroxycoumarin di-glucoside                       | Lignans and Coumarins | --     | --                                                                              |
| 127 | 2,5-Dihydroxy benzoic acid O-hexside                 | Phenolic acids        | --     | --                                                                              |
| 128 | 1-O- $\beta$ -D-Glucopyranosyl sinapate              | Phenolic acids        | --     | --                                                                              |
| 129 | Cyanidin O-syringic acid                             | Flavonoids            | --     | --                                                                              |
| 130 | Peonidin 3-O-(6''-malonylglucoside)                  | Flavonoids            | --     | --                                                                              |
| 131 | Chrysoeriol 7-O-rutinoside                           | Flavonoids            | --     | --                                                                              |
| 132 | Chrysoeriol O-glucuronic acid                        | Flavonoids            | --     | --                                                                              |
| 133 | Tricin O-saccharic acid                              | Flavonoids            | --     | --                                                                              |
| 134 | Tricin O-glucuronic acid                             | Flavonoids            | --     | --                                                                              |
| 135 | 3-O-p-coumaroyl quinic acid O-hexoside               | Phenolic acids        | --     | --                                                                              |
| 136 | 5-O-p-Coumaroyl shikimic acid O-hexoside             | Phenolic acids        | --     | --                                                                              |
| 137 | 3-O-p-Coumaroyl quinic acid                          | Phenolic acids        | C12208 | ko00940,ko00941,ko00945,ko01110                                                 |
| 138 | Syringic acid O-glucoside                            | Phenolic acids        | --     | --                                                                              |
| 139 | Di-O-methylquercetin                                 | Flavonoids            | C01265 | ko00944                                                                         |
| 140 | Luteolin                                             | Flavonoids            | C01514 | ko00941,ko00944,ko01100,ko01110                                                 |
| 141 | Benzoic acid                                         | Phenolic acids        | C00180 | ko00360,ko00362,ko00621,ko00623,ko00627,ko01063,ko01100,ko01110,ko01120,ko01220 |
| 142 | Terephthalic acid                                    | Phenolic acids        | C06337 | ko00624,ko00627,ko01100,ko01120,ko01220                                         |
| 143 | Kaempferol 7-O-rhamnoside                            | Flavonoids            | --     | --                                                                              |
| 144 | p-Coumaric acid                                      | Phenolic acids        | C00811 | ko00130,ko00350,ko00940,ko00950,ko00999,ko01061,ko01100,ko01110,ko01220         |
| 145 | Acetylcholine                                        | Alkaloids             | C08201 | --                                                                              |
| 146 | 3-Carbamyl-1-methylpyridinium(1-Methyl nicotinamide) | Others                | C02918 | ko00760,ko01100,ko04976                                                         |
| 147 | Trigonelline                                         | Alkaloids             | C01004 | ko00760                                                                         |
| 148 | Protocatechuic aldehyde                              | Flavonoids            | C16700 | ko00950,ko01063                                                                 |
| 149 | Kaempferol 3,7-dirhamnoside(Kaempferitrin)           | Flavonoids            | C16981 | --                                                                              |

|     |                                                    |                       |        |                                                                 |
|-----|----------------------------------------------------|-----------------------|--------|-----------------------------------------------------------------|
| 150 | N-Acetylputrescine                                 | Alkaloids             | C02714 | ko00330,ko01100                                                 |
| 151 | Sinapinaldehyde                                    | Phenolic acids        | --     | --                                                              |
| 152 | Peonidin 3-O-glucoside                             | Flavonoids            | C12141 | ko00942                                                         |
| 153 | Riboprine                                          | Phenolic acids        | --     | --                                                              |
| 154 | Skimmin                                            | Lignans and Coumarins | --     | --                                                              |
| 155 | 4-Methoxycinnamaldehyde                            | Phenolic acids        | --     | --                                                              |
| 156 | Peonidin 3,5-O-diglucoside chloride                | Flavonoids            | --     | --                                                              |
| 157 | 1-O-Feruloyl-3-O-p-Coumaroyl glycerol              | Phenolic acids        | --     | --                                                              |
| 158 | Rhein-8-O-D-glucopyranoside                        | Quinones              | --     | --                                                              |
| 159 | Protocatechuic acid-4-glucoside                    | Phenolic acids        | --     | --                                                              |
| 160 | Olivin Diglucoside                                 | Lignans and Coumarins | --     | --                                                              |
| 161 | Eucommin A                                         | Lignans and Coumarins | C10560 | --                                                              |
| 162 | 1-Hydroxyterpinin monoglucoside                    | Lignans and Coumarins | --     | --                                                              |
| 163 | Terpineol monoglucoside                            | Lignans and Coumarins | --     | --                                                              |
| 164 | 1-O-[(E)-p-Cumaroyl]- $\beta$ -D-glucopyranose     | Phenolic acids        | --     | --                                                              |
| 165 | 1-O-[(E)-Caffeoyl]- $\beta$ -D-glucopyranose       | Phenolic acids        | --     | --                                                              |
| 166 | 3-O-(E)-p-Coumaroyl quinic acid                    | Phenolic acids        | --     | --                                                              |
| 167 | Sibiricose A5                                      | Phenolic acids        | --     | --                                                              |
| 168 | Lancerin                                           | Phenolic acids        | C10075 | --                                                              |
| 169 | Ayapin                                             | Lignans and Coumarins | C18078 | --                                                              |
| 170 | (+)-Syringaresinol                                 | Lignans and Coumarins | C10889 | --                                                              |
| 171 | Medioresinol                                       | Lignans and Coumarins | --     | --                                                              |
| 172 | 3,4,5-Trimethoxyphenyl- $\beta$ -D-Glucopyranoside | Phenolic acids        | --     | --                                                              |
| 173 | 3,5-Di-O-galloylshikimic acid                      | Phenolic acids        | --     | --                                                              |
| 174 | Hexadecanoic acid                                  | Phenolic acids        | C00249 | ko00061,ko00062,ko00071,ko00073,ko01040,ko01060,ko01100,ko01212 |
| 175 | Bioquercetin                                       | Flavonoids            | --     | --                                                              |
| 176 | Deacetylasperulosidic acid                         | Terpenoids            | --     | --                                                              |
| 177 | Rutundic acid                                      | Terpenoids            | --     | --                                                              |
| 178 | Kaempferol-3,7-O- $\alpha$ -L-rhamnoside           | Flavonoids            | --     | --                                                              |
| 179 | Glucogallin                                        | Phenolic acids        | --     | --                                                              |

|     |                                                                   |                       |        |         |
|-----|-------------------------------------------------------------------|-----------------------|--------|---------|
| 180 | Apigenin-3-O- $\alpha$ -L-rhamnoside                              | Flavonoids            | --     | --      |
| 181 | Methyl sinapate                                                   | Phenolic acids        | --     | --      |
| 182 | $\beta$ -D-Furanofructosyl- $\alpha$ -D-(3-mustard acyl)glucoside | Phenolic acids        | --     | --      |
| 183 | 3-Hydroxy-4-isopropylbenzylalcohol 3-glucoside                    | Phenolic acids        | --     | --      |
| 184 | Apigenin-7-O- $\beta$ -D-glucuronide                              | Flavonoids            | --     | --      |
| 185 | 24,30-Dihydroxy-12(13)-enolupinol                                 | Terpenoids            | --     | --      |
| 186 | Tetrahydroxy-flavone-7-O- $\beta$ -D-glucuronide                  | Flavonoids            | --     | --      |
| 187 | 2,3-Dihydroxy 5(6),12(13)diene ursolic acid                       | Terpenoids            | --     | --      |
| 188 | 3,24-Dihydroxy-17,21-semiacetal-12(13)ol eanolic fruit            | Terpenoids            | --     | --      |
| 189 | 2-Hydroxyoleanolic acid                                           | Terpenoids            | --     | --      |
| 190 | Rosmarinyl Glucoside                                              | Phenolic acids        | --     | --      |
| 191 | Oleuropeinic acid                                                 | Terpenoids            | --     | --      |
| 192 | Verbascoside                                                      | Phenolic acids        | C10501 | --      |
| 193 | Oleoside 11-methyl ester                                          | Phenolic acids        | --     | --      |
| 194 | Hispidulin                                                        | Flavonoids            | C10058 | --      |
| 195 | Jaceosidin                                                        | Flavonoids            | --     | --      |
| 196 | Scutellarin                                                       | Flavonoids            | --     | --      |
| 197 | 2-Feruloyl-sn-glycerol                                            | Phenolic acids        | --     | --      |
| 198 | Malonyglygenistin                                                 | Flavonoids            | --     | --      |
| 199 | Fraxidin                                                          | Lignans and Coumarins | C17479 | --      |
| 200 | Pratensein                                                        | Flavonoids            | C10520 | ko00943 |
| 201 | Luteolin-7-O-glucuronide                                          | Flavonoids            | --     | --      |
| 202 | Diosmetin-7-O-galactoside                                         | Flavonoids            | --     | --      |
| 203 | Diosmetin-7-O-glucuronide                                         | Flavonoids            | --     | --      |
| 204 | Diosmetin-7-O-(6'-O-malonyl)- $\beta$ -D-glucoside                | Flavonoids            | --     | --      |
| 205 | Luteolin-7-O-rutinoside                                           | Flavonoids            | --     | --      |
| 206 | Diosmetin-7-O-rutin                                               | Flavonoids            | --     | --      |

|     |                                                                                                            |                |    |    |
|-----|------------------------------------------------------------------------------------------------------------|----------------|----|----|
| 207 | Tussilagonone                                                                                              | Terpenoids     | -- | -- |
| 208 | Calceolarioside A                                                                                          | Phenolic acids | -- | -- |
| 209 | 3'-O-D-glucosylgentiopicroside                                                                             | Terpenoids     | -- | -- |
| 210 | Deglucosylgelidoside                                                                                       | Terpenoids     | -- | -- |
| 211 | Bartsioside                                                                                                | Others         | -- | -- |
| 212 | Neodiosmin                                                                                                 | Flavonoids     | -- | -- |
| 213 | Vitexin-2-O-D-glucopyranoside                                                                              | Flavonoids     | -- | -- |
| 214 | Dihydro-p-coumarat                                                                                         | Phenolic acids | -- | -- |
| 215 | Methoxy-N-Caffeoyltyramine                                                                                 | Alkaloids      | -- | -- |
| 216 | Cistanoside C                                                                                              | Phenolic acids | -- | -- |
| 217 | Sinapine glucoside                                                                                         | Alkaloids      | -- | -- |
| 218 | 3-{(2-Aminoethoxy)(hydroxy)phosphoryl}oxy}-2-12-octadecadienoate                                           | Alkaloids      | -- | -- |
| 219 | 3-Hydroxypropyl palmitate<br>glc-glucosamine                                                               | Alkaloids      | -- | -- |
| 220 | 3-{(2-Aminoethoxy)(hydroxy)phosphoryl}oxy}-2-hydroxypropyl palmitate                                       | Alkaloids      | -- | -- |
| 221 | Bis(N,N-diethylethanaminium)-2-acetamid<br>o-1,5-anhydro-2-deoxy-1-[hydroxy(phosphonato)methyl]-D-glucitol | Alkaloids      | -- | -- |
| 222 | Propyl2-(trimethylammonio)ethyl<br>phosphate                                                               | Others         | -- | -- |
| 223 | N-Benzylmethylene isomethylamine                                                                           | Alkaloids      | -- | -- |
| 224 | Chrysoeriol-7-O-[β-D-glucuronopyranosyl-<br>(1→2)-O-β-D-glucuronopyranoside]                               | Flavonoids     | -- | -- |
| 225 | Apigenin-7-O-[β-D-glucuronopyranosyl(1<br>→2)-O-β-D-glucuronopyranoside)                                   | Flavonoids     | -- | -- |
| 226 | 6-Hydroxykaempferol-3,6-O-Diglucoside                                                                      | Flavonoids     | -- | -- |
| 227 | Catalpol                                                                                                   | Others         | -- | -- |
| 228 | Rehmannioside D                                                                                            | Terpenoids     | -- | -- |

Table. S3. KEGG annotation of 58 differential metabolites

| NO. | Compounds                                 | Class          | VIP  | Fold_Change | Type | kegg_map                        |
|-----|-------------------------------------------|----------------|------|-------------|------|---------------------------------|
| 1   | Limocitrin-O-rhamnoside-O-rhamnoside      | Flavonoids     | 1.33 | 102.48      | up   | --                              |
| 2   | Phytolaccagenin                           | Terpenoids     | 1.93 | 0.00        | down | --                              |
| 3   | Ehretioside                               | Alkaloids      | 1.90 | 12259.26    | up   | --                              |
| 4   | Aracarpene 1                              | Flavonoids     | 1.95 | 21777.78    | up   | --                              |
| 5   | Kaempferol 3-glucuronide-7-glucoside      | Flavonoids     | 1.86 | 8529.63     | up   | --                              |
| 6   | Apigenin-7-O-diglucuronide                | Flavonoids     | 2.07 | 79666.67    | up   | --                              |
| 7   | Tricin                                    | Flavonoids     | 1.68 | 1644.44     | up   | --                              |
| 8   | Kaempferol glc-rha                        | Flavonoids     | 1.93 | 16814.81    | up   | --                              |
| 9   | 6,7,8-Tetrahydroxy-5-methoxyflavone       | Flavonoids     | 1.85 | 8066.67     | up   | --                              |
| 10  | Baicalin                                  | Flavonoids     | 1.17 | 34.65       | up   | --                              |
| 11  | Diosmetin                                 | Flavonoids     | 1.95 | 21444.44    | up   | --                              |
| 12  | Pelargonin chloride                       | Flavonoids     | 1.80 | 0.00        | down | ko00942                         |
| 13  | p-Coumaryl alcohol                        | Phenolic acids | 1.03 | 15.94       | up   | ko00940,ko01061,ko01100,ko01110 |
| 14  | N-Oleoylethanolamine                      | Others         | 1.04 | 16.59       | up   | --                              |
| 15  | Robinin(Kaempferol-3-O-gal-rham-7-O-rham) | Flavonoids     | 1.83 | 0.00        | down | --                              |
| 16  | 2'-Acetylacteoside                        | Phenolic acids | 1.19 | 0.02        | down | --                              |
| 17  | Geniposidic acid                          | Terpenoids     | 1.33 | 0.01        | down | --                              |
| 18  | Diosmin                                   | Flavonoids     | 1.23 | 47.07       | up   | --                              |
| 19  | Homovanillic alcohol                      | Phenolic acids | 1.68 | 1718.52     | up   | --                              |
| 20  | Peonidin O-hexoside                       | Flavonoids     | 1.80 | 5107.41     | up   | --                              |
| 21  | Syringetin 3-O-hexoside                   | Flavonoids     | 1.13 | 0.04        | down | --                              |
| 22  | Chrysoeriol O-hexosyl-O-hexoside          | Flavonoids     | 1.84 | 6937.04     | up   | --                              |
| 23  | Tricin O-malonylhexoside                  | Flavonoids     | 1.90 | 12407.41    | up   | --                              |
| 24  | Tricin 7-O-hexoside                       | Flavonoids     | 1.16 | 34.00       | up   | --                              |
| 25  | 1-O- $\beta$ -D-Glucopyranosyl sinapate   | Phenolic acids | 1.91 | 0.00        | down | --                              |
| 26  | Chrysoeriol 7-O-rutinoside                | Flavonoids     | 1.90 | 13111.11    | up   | --                              |
| 27  | Chrysoeriol O-glucuronic acid             | Flavonoids     | 1.44 | 228.92      | up   | --                              |
| 28  | Tricin O-glucuronic acid                  | Flavonoids     | 2.08 | 85814.81    | up   | --                              |
| 29  | 3-O-p-coumaroyl quinic acid O-hexoside    | Phenolic acids | 1.60 | 859.26      | up   | --                              |

|    |                                                                   |                |      |          |      |                                                                                 |
|----|-------------------------------------------------------------------|----------------|------|----------|------|---------------------------------------------------------------------------------|
| 30 | 5-O-p-Coumaroyl shikimic acid O-hexoside                          | Phenolic acids | 1.75 | 3048.15  | up   | --                                                                              |
| 31 | Luteolin                                                          | Flavonoids     | 1.52 | 452.22   | up   | ko00941,ko00944,ko01100,ko01110                                                 |
| 32 | Benzoic acid                                                      | Phenolic acids | 1.94 | 18703.70 | up   | ko00360,ko00362,ko00621,ko00623,ko00627,ko01063,ko01100,ko01110,ko01120,ko01220 |
| 33 | Kaempferol 7-O-rhamnoside                                         | Flavonoids     | 1.71 | 0.00     | down | --                                                                              |
| 34 | Protocatechuic aldehyde                                           | Flavonoids     | 1.92 | 15407.41 | up   | ko00950,ko01063                                                                 |
| 35 | Kaempferol 3,7-dirhamnoside(Kaempferitrin)                        | Flavonoids     | 2.06 | 0.00     | down | --                                                                              |
| 36 | Peonidin 3-O-glucoside                                            | Flavonoids     | 1.80 | 4762.96  | up   | ko00942                                                                         |
| 37 | Bioquercetin                                                      | Flavonoids     | 1.57 | 0.00     | down | --                                                                              |
| 38 | Kaempferol-3,7-O- $\alpha$ -L-rhamnoside                          | Flavonoids     | 1.87 | 0.00     | down | --                                                                              |
| 39 | $\beta$ -D-Furanofructosyl- $\alpha$ -D-(3-mustard acyl)glucoside | Phenolic acids | 1.03 | 15.97    | up   | --                                                                              |
| 40 | 3-Hydroxy-4-isopropylbenzylalcohol 3-glucoside                    | Phenolic acids | 1.99 | 31074.07 | up   | --                                                                              |
| 41 | Apigenin-7-O- $\beta$ -D-glucuronide                              | Flavonoids     | 1.22 | 49.05    | up   | --                                                                              |
| 42 | Tetahydroxy-flavone-7-O- $\beta$ -D-glucuronide                   | Flavonoids     | 2.01 | 38074.07 | up   | --                                                                              |
| 43 | Hispidulin                                                        | Flavonoids     | 1.85 | 8237.04  | up   | --                                                                              |
| 44 | Jaceosidin                                                        | Flavonoids     | 1.63 | 1081.11  | up   | --                                                                              |
| 45 | Scutellarin                                                       | Flavonoids     | 2.01 | 39037.04 | up   | --                                                                              |
| 46 | Malonyglygenistin                                                 | Flavonoids     | 1.51 | 40.36    | up   | --                                                                              |
| 47 | Pratensein                                                        | Flavonoids     | 1.86 | 8407.41  | up   | ko00943                                                                         |
| 48 | Luteolin-7-O-glucuronide                                          | Flavonoids     | 1.61 | 60.30    | up   | --                                                                              |
| 49 | Diosmetin-7-O-galactoside                                         | Flavonoids     | 1.02 | 14.96    | up   | --                                                                              |
| 50 | Diosmetin-7-O-glucuronide                                         | Flavonoids     | 1.39 | 156.08   | up   | --                                                                              |
| 51 | Diosmetin-7-O-(6'-O-malonyl)- $\beta$ -D-glucoside                | Flavonoids     | 1.67 | 1533.33  | up   | --                                                                              |
| 52 | Luteolin-7-O-rutinoside                                           | Flavonoids     | 1.87 | 0.00     | down | --                                                                              |
| 53 | 3'-O-D-glucosylgentiopicroside                                    | Terpenoids     | 1.69 | 1862.96  | up   | --                                                                              |

|    |                                                                                                        |                |      |           |      |    |
|----|--------------------------------------------------------------------------------------------------------|----------------|------|-----------|------|----|
| 54 | Bartsioside                                                                                            | Others         | 1.98 | 28333.33  | up   | -- |
| 55 | Cistanoside C                                                                                          | Phenolic acids | 1.04 | 0.06      | down | -- |
| 56 | Sinapine glucoside                                                                                     | Alkaloids      | 1.83 | 0.00      | down | -- |
| 57 | Chrysoeriol-7-O-[ $\beta$ -D-glucuronopyranosyl-(1 $\rightarrow$ 2)-O- $\beta$ -D-glucuronopyranoside] | Flavonoids     | 2.07 | 74185.19  | up   | -- |
| 58 | Apigenin-7-O-[ $\beta$ -D-glucuronopyranosyl(1 $\rightarrow$ 2)-O- $\beta$ -D-glucuronopyranoside]     | Flavonoids     | 2.11 | 116407.41 | up   | -- |
